# Supplementary material for: Design, synthesis, and biological evaluation of new 6,N2-diaryl-1,3,5-triazine-2,4-diamines as anticancer agents selectively targeting triple negative breast cancer cells
Source: Royal Society of Chemistry journal article supplement (doi:10.1039/d0ra04970k), 2020-01-01
Supplement: d0ra04970k2.pdf [file d0ra04970k2.pdf]

*RSC Advances*

Electronic supplementary information (ESI)

Design, synthesis, and biological evaluation of new  
6,*N*<sup>2</sup>-diaryl-1,3,5-triazine-2,4-diamines as anticancer agents  
selectively targeting triple negative breast cancer cells

Ahmad Junaid,<sup>a</sup> Felicia Phei Lin Lim,<sup>a</sup> Edward R. T. Tiekink<sup>b</sup> and Anton V. Dolzhenko<sup>\*ac</sup>

<sup>a</sup> School of Pharmacy, Monash University Malaysia, Jalan Lagoon Selatan, Bandar Sunway, Selangor Darul Ehsan 47500, Malaysia

<sup>b</sup> Research Centre for Crystalline Materials, School of Science and Technology, 5 Jalan Universiti, Sunway University, Bandar Sunway, Selangor Darul Ehsan 47500, Malaysia

<sup>c</sup> School of Pharmacy and Biomedical Sciences, Curtin Health Innovation Research Institute, Faculty of Health Sciences, Curtin University, GPO Box U1987 Perth, Western Australia 6845, Australia

## Contents

|                                                                                                                                               |     |
|-----------------------------------------------------------------------------------------------------------------------------------------------|-----|
| Copies of $^1\text{H}$ and $^{13}\text{C}$ NMR spectra of 6, $N^2$ ,-diaryl-1,3,5-triazine-2,4-diamines <b>1-21</b> .....                     | S3  |
| X-ray structure analysis of $N^2$ -(4-(trifluoromethoxy)phenyl)-<br>6-(3,4,5-trimethoxyphenyl)-1,3,5-triazine-2,4-diamine ( <b>20</b> ) ..... | S25 |
| Concentration-response curves for the compounds tested against<br>MDA-MB231 breast cancer cells .....                                         | S27 |
| Concentration-response curves for the most active compounds tested against<br>SKBR-3 breast cancer cells .....                                | S31 |
| Concentration-response curves for the most active compounds tested against<br>MCF-7 breast cancer cells .....                                 | S34 |
| Time-dependent concentration-response curves for compounds <b>16</b> and <b>18</b> tested against<br>MDA-MB231 breast cancer cells .....      | S35 |
| Predicted ADME properties of compounds <b>1-21</b> .....                                                                                      | S36 |

**Copies of  $^1\text{H}$  and  $^{13}\text{C}$  NMR spectra of 6, $N^2$ ,-diaryl-1,3,5-triazine-2,4-diamines 1-21**

6-(3-Fluorophenyl)-N<sup>2</sup>-(2-methoxyphenyl)-1,3,5-triazine-2,4-diamine (1)

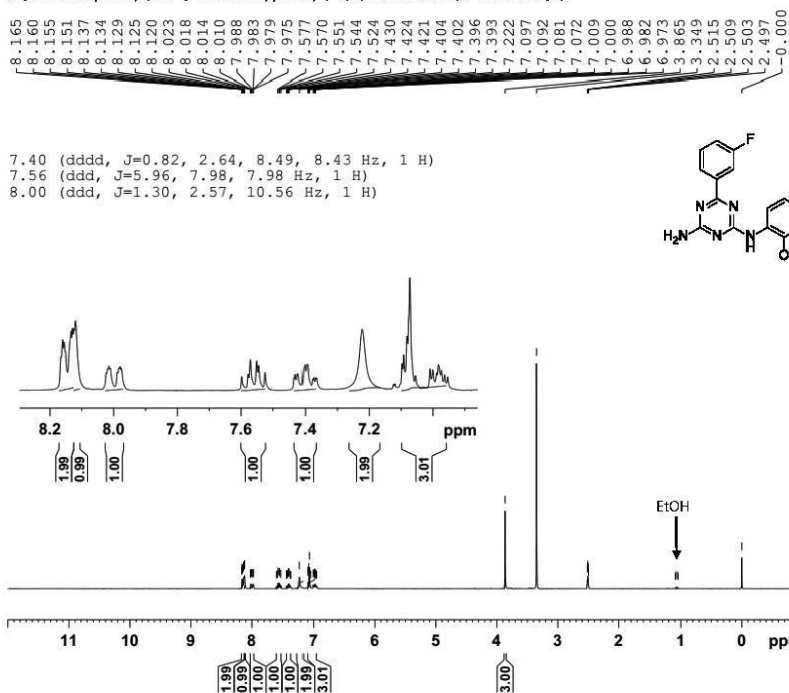

7.40 (dddd, J=0.82, 2.64, 8.49, 8.43 Hz, 1 H)  
 7.56 (ddd, J=5.96, 7.98, 7.98 Hz, 1 H)  
 8.00 (ddd, J=1.30, 2.57, 10.56 Hz, 1 H)

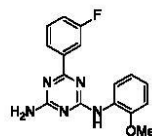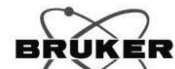

Current Data Parameters  
 NAME JA0520  
 EXPNO 1  
 PROCNO 1

F2 - Acquisition Parameters  
 Date\_ 20180919  
 Time 10.30  
 INSTRUM FOURIER300  
 PROBHD 5 mm DUL 13C-1  
 PULPROG zgpg30  
 TD 65536  
 SOLVENT DMSO  
 NS 16  
 DS 2  
 SWH 6103.516 Hz  
 FIDRES 0.093132 Hz  
 AQ 5.3687091 sec  
 RG 56.9687  
 DW 81.920 usec  
 DE 6.50 usec  
 TE 300.1 K  
 D1 1.00000000 sec  
 TDO 1

==== CHANNEL f1 =====  
 SFO1 300.1618536 MHz  
 NUC1 1H  
 P1 13.50 usec  
 PLW1 9.30000019 W

F2 - Processing parameters  
 SI 65536  
 SF 300.1599982 MHz  
 WDW EM  
 SSB 0  
 LB 0.30 Hz  
 GB 0  
 PC 1.00

6-(3-Fluorophenyl)-N<sup>2</sup>-(2-methoxyphenyl)-1,3,5-triazine-2,4-diamine (1)

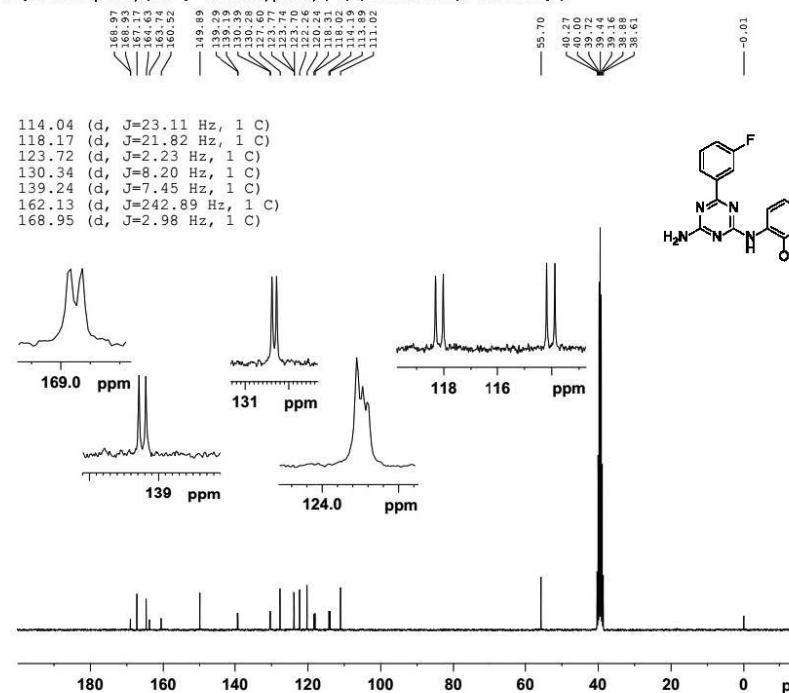

114.04 (d, J=23.11 Hz, 1 C)  
 118.17 (d, J=21.82 Hz, 1 C)  
 123.72 (d, J=2.23 Hz, 1 C)  
 130.34 (d, J=8.20 Hz, 1 C)  
 139.24 (d, J=7.45 Hz, 1 C)  
 162.13 (d, J=242.89 Hz, 1 C)  
 168.95 (d, J=2.98 Hz, 1 C)

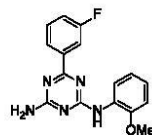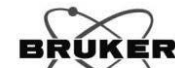

Current Data Parameters  
 NAME JA0520  
 EXPNO 2  
 PROCNO 1

F2 - Acquisition Parameters  
 Date\_ 20180919  
 Time 19.06  
 INSTRUM FOURIER300  
 PROBHD 5 mm DUL 13C-1  
 PULPROG zgpg30  
 TD 65536  
 SOLVENT DMSO  
 NS 5120  
 DS 4  
 SWH 24414.063 Hz  
 FIDRES 0.372529 Hz  
 AQ 1.3421773 sec  
 RG 501.187  
 DW 20.480 usec  
 DE 6.50 usec  
 TE 300.3 K  
 D1 2.00000000 sec  
 D11 0.03000000 sec  
 D31 0.00001500 sec  
 D40 0.00439029 sec  
 L4 37  
 L5 53  
 P32 98.00 usec  
 TDO 5

==== CHANNEL f1 =====  
 SFO1 75.4828392 MHz  
 NUC1 13C  
 P1 15.00 usec  
 PLW1 22.00000000 W

==== CHANNEL f2 =====  
 SFO2 300.1612006 MHz  
 NUC2 1H  
 CPDPRG[2] waltz16  
 PCPD2 98.00 usec  
 PLW2 9.30000019 W  
 PLW12 0.29359001 W  
 PLW13 0.20359001 W

F2 - Processing parameters  
 SI 32768  
 SF 75.4753335 MHz  
 WDW EM  
 SSB 0  
 LB 1.00 Hz  
 GB 0  
 PC 1.40

6-(4-Chlorophenyl)-N<sup>2</sup>-(p-tolyl)-1,3,5-triazine-2,4-diamine (2)

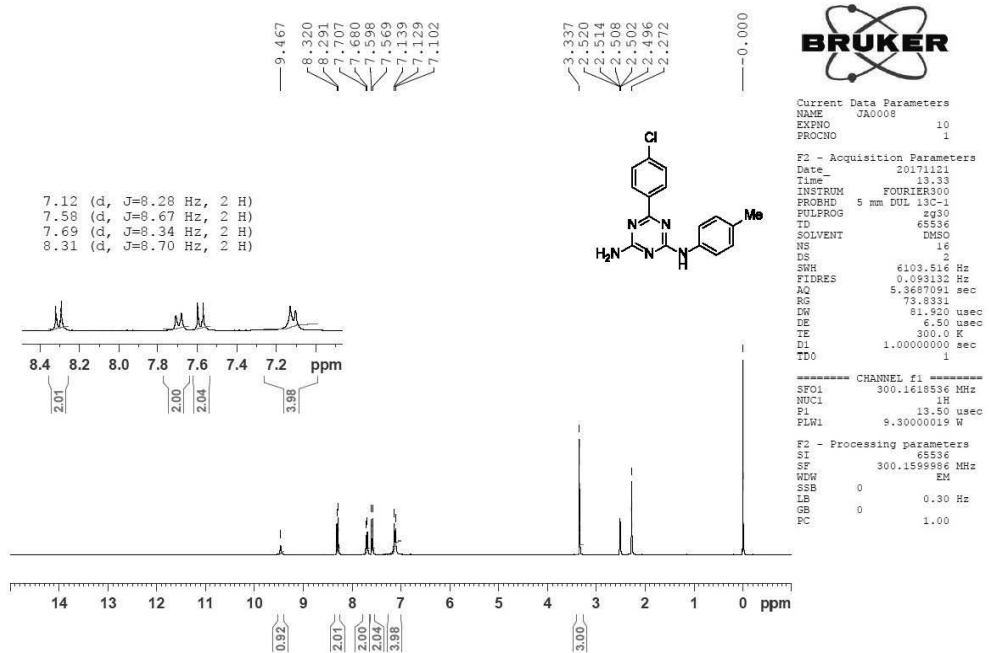

6-(4-Chlorophenyl)-N<sup>2</sup>-(p-tolyl)-1,3,5-triazine-2,4-diamine (2)

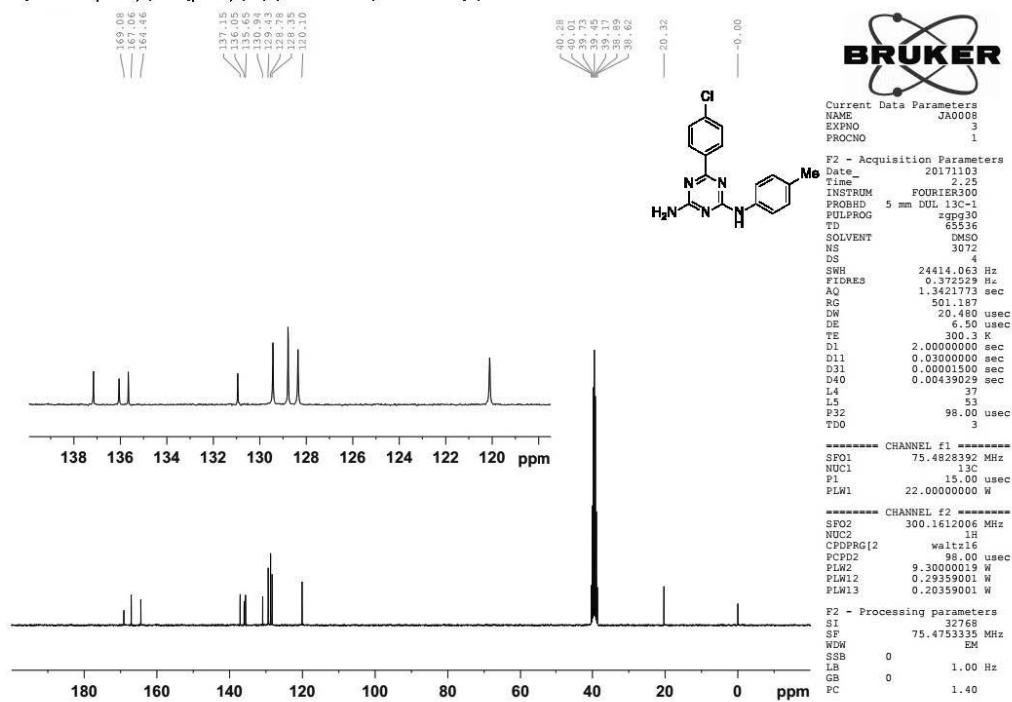

***N*<sup>2</sup>-(2-Chlorophenyl)-6-(4-(trifluoromethyl)phenyl)-1,3,5-triazine-2,4-diamine (3)**

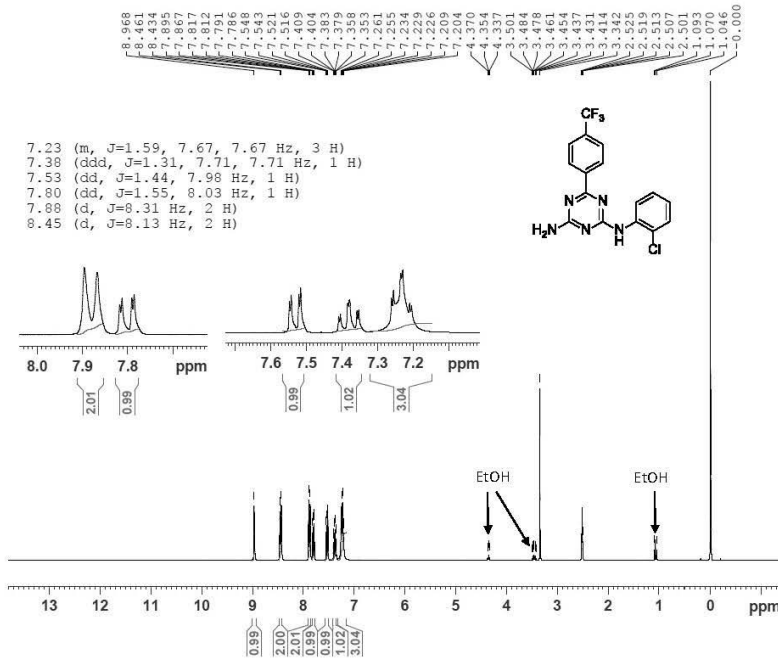

**BRUKER**

Current Data Parameters  
 NAME JA0081  
 EXPNO 1  
 PROCNO 1

F2 - Acquisition Parameters  
 Date\_ 20180211  
 Time\_ 18:44  
 INSTRUM FOURIER300  
 PROBHD 5 mm DUL 13C-1  
 PULPROG zgpg30  
 TD 65536  
 SOLVENT DMSO  
 NS 16  
 DS 2  
 SWH 6103.516 Hz  
 FIDRES 0.059132 Hz  
 AQ 5.3687091 sec  
 RG 66.0856  
 DW 81.320 usec  
 DE 6.50 usec  
 TE 300.1 K  
 D1 1.00000000 sec  
 TDO 1

==== CHANNEL f1 =====  
 SF01 300.1618536 MHz  
 NUC1 1H  
 P1 13.50 usec  
 PLW1 9.30000019 W

F2 - Processing parameters  
 SI 65536  
 SF 300.1599872 MHz  
 WDW EM  
 SSB 0  
 LB 0.30 Hz  
 GB 0  
 PC 1.00

***N*<sup>2</sup>-(2-Chlorophenyl)-6-(4-(trifluoromethyl)phenyl)-1,3,5-triazine-2,4-diamine (3)**

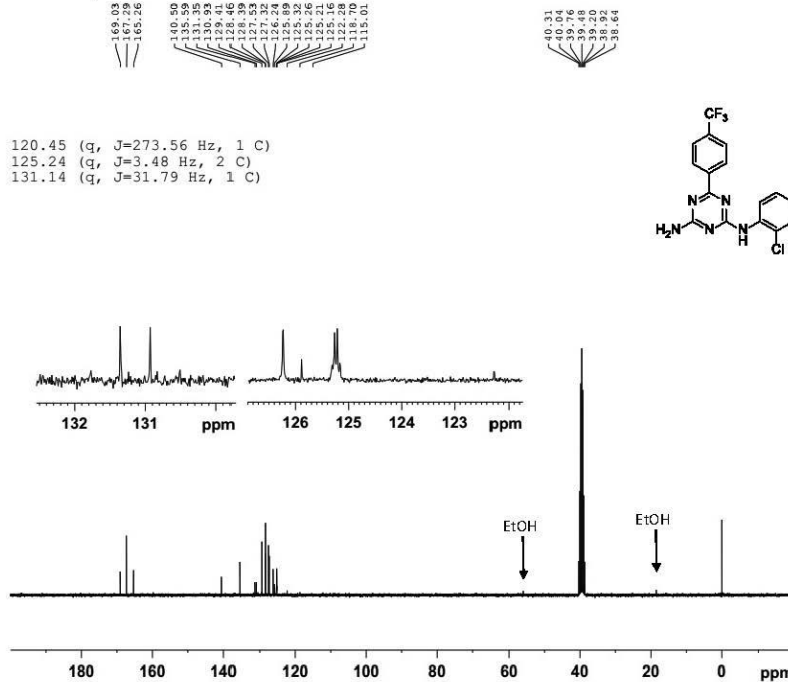

**BRUKER**

Current Data Parameters  
 NAME JA0081  
 EXPNO 2  
 PROCNO 1

F2 - Acquisition Parameters  
 Date\_ 20180211  
 Time\_ 18:58  
 INSTRUM FOURIER300  
 PROBHD 5 mm DUL 13C-1  
 PULPROG zgpg30  
 TD 65536  
 SOLVENT DMSO  
 NS 3072  
 DS 4  
 SWH 24414.063 Hz  
 FIDRES 0.372529 Hz  
 AQ 1.3421773 sec  
 RG 501.187  
 DW 20.480 usec  
 DE 6.50 usec  
 TE 300.3 K  
 D1 2.00000000 sec  
 D11 0.03000000 sec  
 D31 0.00001500 sec  
 D40 0.00439029 sec  
 L4 37  
 L5 53  
 F32 98.00 usec  
 TDO 3

==== CHANNEL f1 =====  
 SF01 75.4828392 MHz  
 NUC1 13C  
 P1 15.00 usec  
 PLW1 22.00000000 W

==== CHANNEL f2 =====  
 SF02 300.1612006 MHz  
 NUC2 1H  
 CPDPRG12 waltz16  
 PCPD2 98.00 usec  
 PLW2 9.30000019 W  
 PLW12 0.29359001 W  
 PLW13 0.20359001 W

F2 - Processing parameters  
 SI 32768  
 SF 75.4753313 MHz  
 WDW EM  
 SSB 0  
 LB 0 Hz  
 GB 0  
 PC 1.40

**N<sup>2</sup>-(4-Chlorophenyl)-6-(4-(trifluoromethoxy)phenyl)-1,3,5-triazine-2,4-diamine (4)**

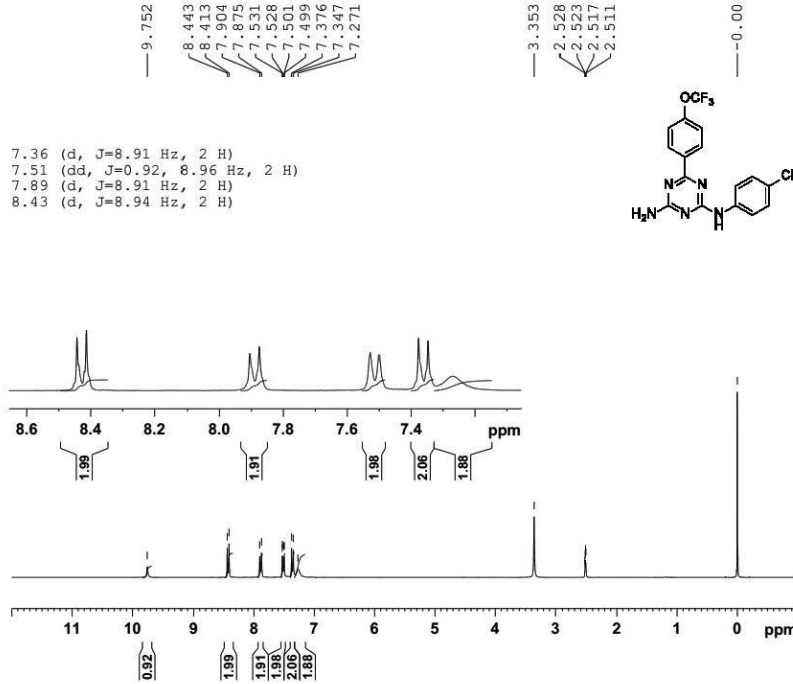

7.36 (d, J=8.91 Hz, 2 H)  
 7.51 (dd, J=0.92, 8.96 Hz, 2 H)  
 7.89 (d, J=8.91 Hz, 2 H)  
 8.43 (d, J=8.94 Hz, 2 H)

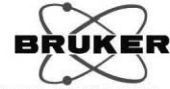

Current Data Parameters  
 NAME JA0022  
 EXPNO 1  
 PROCNO 1

F2 - Acquisition Parameters  
 Date\_ 20180208  
 Time 18.09  
 INSTRUM FOURIER300  
 PROBHD 5 mm DUL 13C-1  
 PULPROG zg30  
 TD 65536  
 SOLVENT DMSO  
 NS 16  
 DS 2  
 SWH 6103.516 Hz  
 FIDRES 0.093132 Hz  
 AQ 5.3687091 sec  
 RG 66.9048  
 DW 81.920 usec  
 DE 6.50 usec  
 TE 300.1 K  
 D1 1.00000000 sec  
 TDO 1

==== CHANNEL f1 =====  
 SF01 300.1618536 MHz  
 NUC1 1H  
 P1 13.50 usec  
 PLW1 9.3000019 W

F2 - Processing parameters  
 SI 300.1599960 MHz  
 SF 300.1599960 MHz  
 WDW EM  
 SSB 0  
 LB 0.50 Hz  
 GB 0  
 PC 1.00

**N<sup>2</sup>-(4-Chlorophenyl)-6-(4-(trifluoromethoxy)phenyl)-1,3,5-triazine-2,4-diamine (4)**

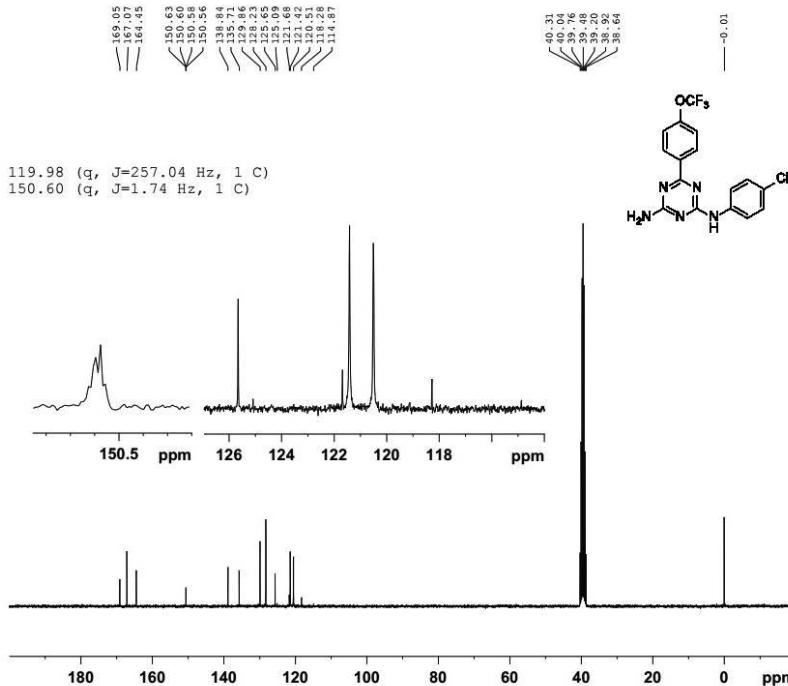

119.98 (q, J=257.04 Hz, 1 C)  
 150.60 (q, J=1.74 Hz, 1 C)

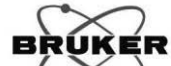

Current Data Parameters  
 NAME JA0022  
 EXPNO 2  
 PROCNO 1

F2 - Acquisition Parameters  
 Date\_ 20180208  
 Time 21.20  
 INSTRUM FOURIER300  
 PROBHD 5 mm DUL 13C-1  
 PULPROG zgpg30  
 TD 65536  
 SOLVENT DMSO  
 NS 3072  
 DS 4  
 SWH 24414.063 Hz  
 FIDRES 0.372529 Hz  
 AQ 1.3421773 sec  
 RG 501.187  
 DW 20.480 usec  
 DE 6.50 usec  
 TE 300.3 K  
 D1 2.0000000 sec  
 D11 0.0300000 sec  
 D31 0.00001500 sec  
 D40 0.00439029 sec  
 L4 37  
 L5 53  
 P32 98.00 usec  
 TDO 3

==== CHANNEL f1 =====  
 SF01 75.4828392 MHz  
 NUC1 13C  
 P1 15.00 usec  
 PLW1 22.0000000 W

==== CHANNEL f2 =====  
 SF02 300.1612006 MHz  
 NUC2 1H  
 CPDPRG12 waltz16  
 PCPD2 98.00 usec  
 PLW2 9.3000019 W  
 PLW12 0.29359001 W  
 PLW13 0.20359001 W

F2 - Processing parameters  
 SI 32768  
 SF 75.4753305 MHz  
 WDW EM  
 SSB 0  
 LB 0.50 Hz  
 GB 0  
 PC 1.40

***N*<sup>2</sup>-(2-Chlorophenyl)-6-(4-(dimethylamino)phenyl)-1,3,5-triazine-2,4-diamine (5)**

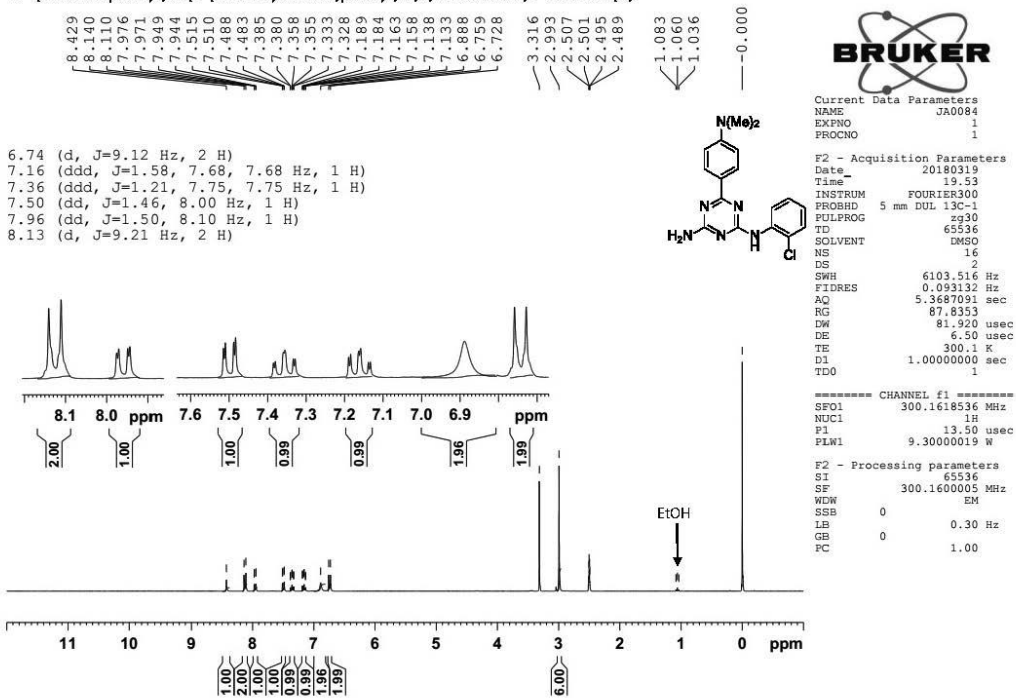

***N*<sup>2</sup>-(2-Chlorophenyl)-6-(4-(dimethylamino)phenyl)-1,3,5-triazine-2,4-diamine (5)**

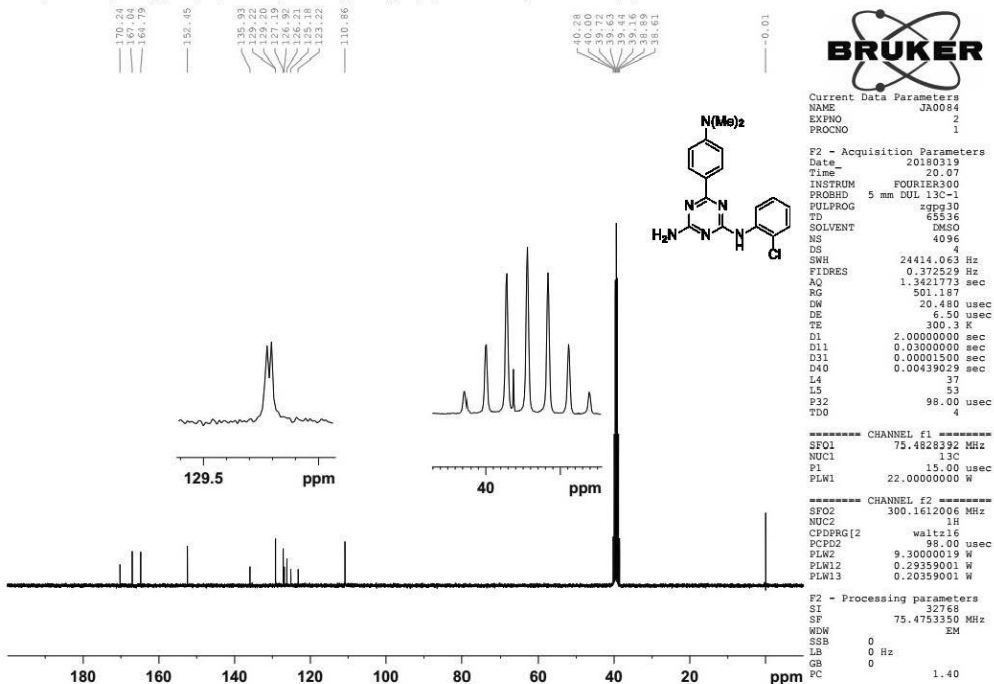



**N<sup>2</sup>-(2-Chlorophenyl)-6-(p-tolyl)-1,3,5-triazine-2,4-diamine (6)**

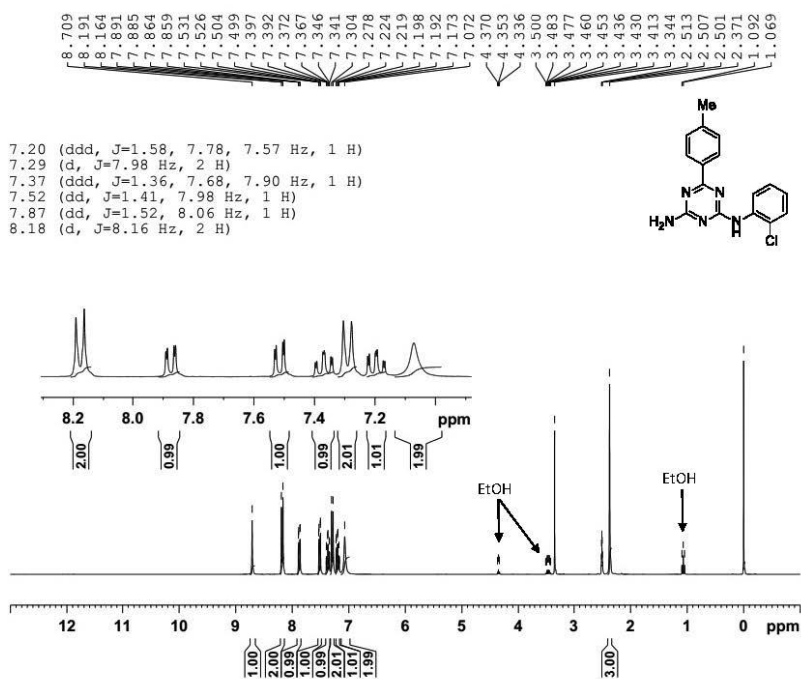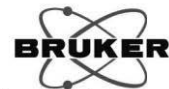

Current Data Parameters  
NAME JAD064  
EXPNO 1  
PROCNO 1

F2 - Acquisition Parameters  
Date\_ 2017110  
Time 16.55  
INSTRUM FOURIER300  
PROBHD 5 mm DUL 13C-1  
PULPROG zg30  
TD 65536  
SOLVENT DMSO  
NS 6  
DS 2  
SWH 6103.566 Hz  
FIDRES 0.093132 Hz  
AQ 5.3687091 sec  
RG 31.623  
DW 81.900 usec  
DE 6.50 usec  
TE 300.2 K  
D1 1.00000000 sec  
TDO 1

==== CHANNEL f1 =====  
SFO1 300.1618536 Mhz  
NUC1 1H  
P1 13.50 usec  
PLW1 9.3000009 W

F2 - Processing parameters  
SI 65536  
SF 300.1599988 Mhz  
WDW EM  
SSB 0  
LB 0.30 Hz  
GB 0  
PC 1.00

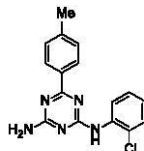

**N<sup>2</sup>-(2-Chlorophenyl)-6-(p-tolyl)-1,3,5-triazine-2,4-diamine (6)**

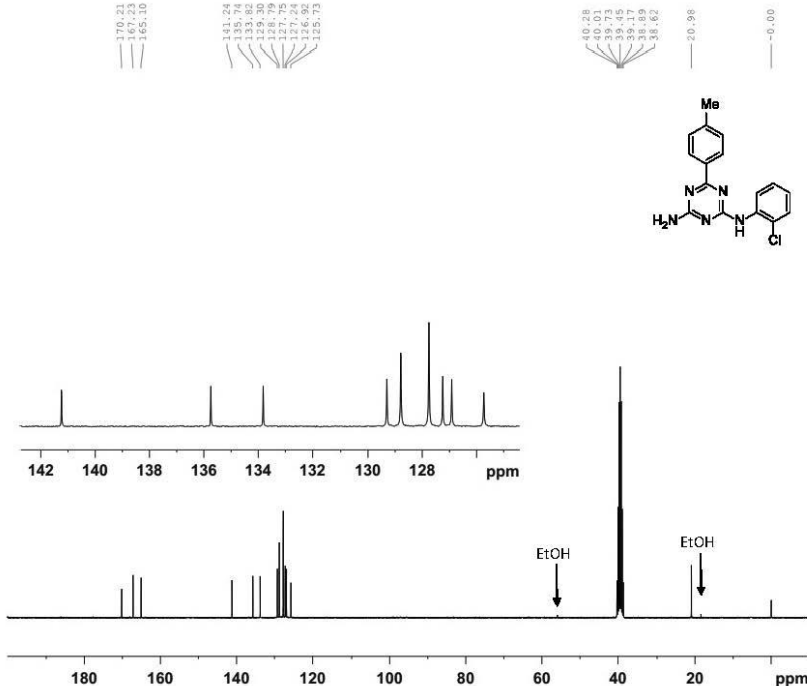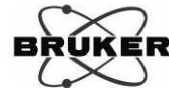

Current Data Parameters  
NAME JAD064  
EXPNO 2  
PROCNO 1

F2 - Acquisition Parameters  
Date\_ 20171111  
Time 0.46  
INSTRUM FOURIER300  
PROBHD 5 mm DUL 13C-1  
PULPROG zgpg30  
TD 65536  
SOLVENT DMSO  
NS 4  
DS 4  
SWH 24414.063 Hz  
FIDRES 0.372529 Hz  
AQ 1.3421773 sec  
RG 501.187  
DW 20.480 usec  
DE 6.50 usec  
TE 300.3 K  
D1 2.00000000 sec  
D11 0.03000000 sec  
D31 0.00001500 sec  
D40 0.00439029 sec  
L4 37  
L5 53  
P32 98.00 usec  
TDO 3

==== CHANNEL f1 =====  
SFO1 75.4828392 Mhz  
NUC1 13C  
P1 15.00 usec  
PLW1 22.00000000 W

==== CHANNEL f2 =====  
SFO2 300.1612006 Mhz  
NUC2 1H  
CPDPRG2 waltz16  
PCPD2 98.00 usec  
PLW2 9.30000019 W  
PLW12 0.29359001 W  
PLW13 0.20359001 W

F2 - Processing parameters  
SI 32768  
SF 75.4753340 Mhz  
WDW EM  
SSB 0  
LB 1.00 Hz  
GB 0  
PC 1.40

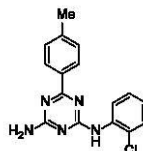

***N*<sup>2</sup>-(4-Chlorophenyl)-6-(*p*-tolyl)-1,3,5-triazine-2,4-diamine (7)**

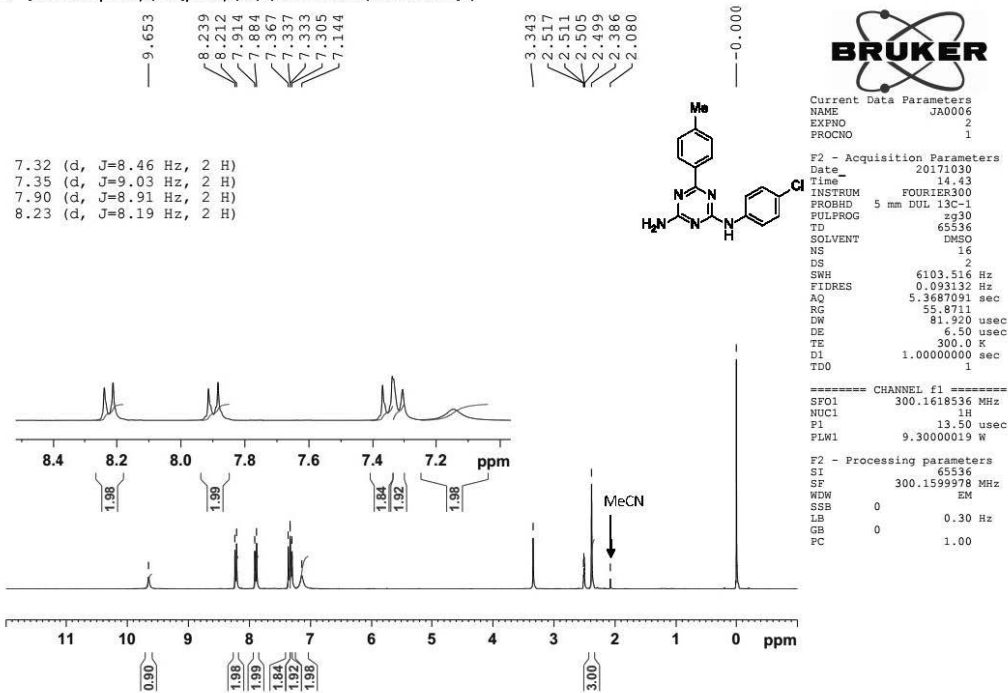

***N*<sup>2</sup>-(4-Chlorophenyl)-6-(*p*-tolyl)-1,3,5-triazine-2,4-diamine (7)**

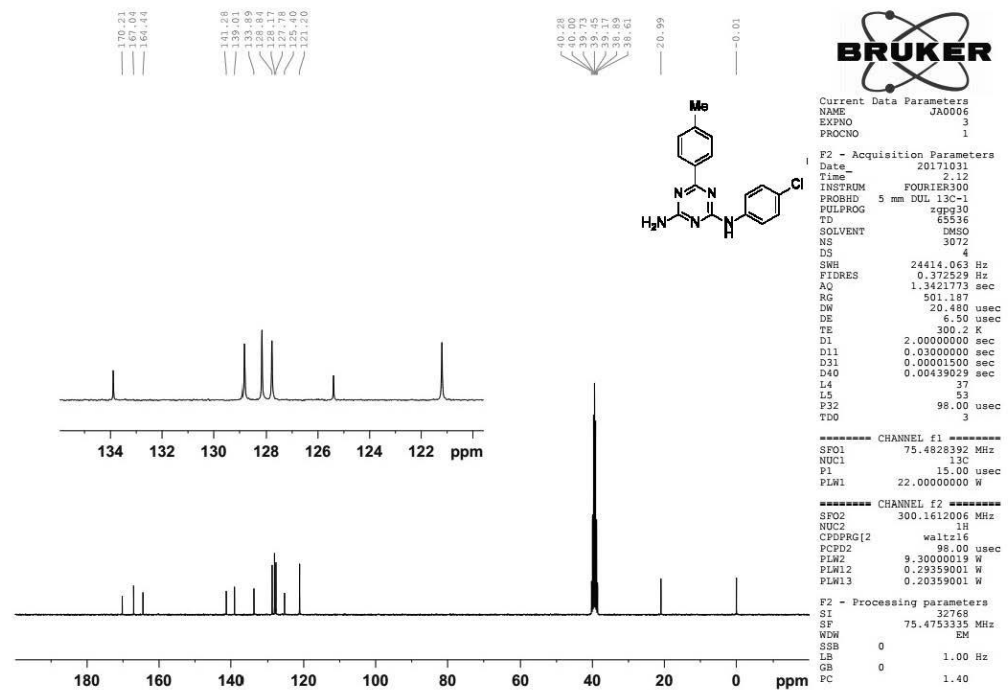

**6-(4-Methoxyphenyl)-N<sup>2</sup>-phenyl-1,3,5-triazine-2,4-diamine (8)**

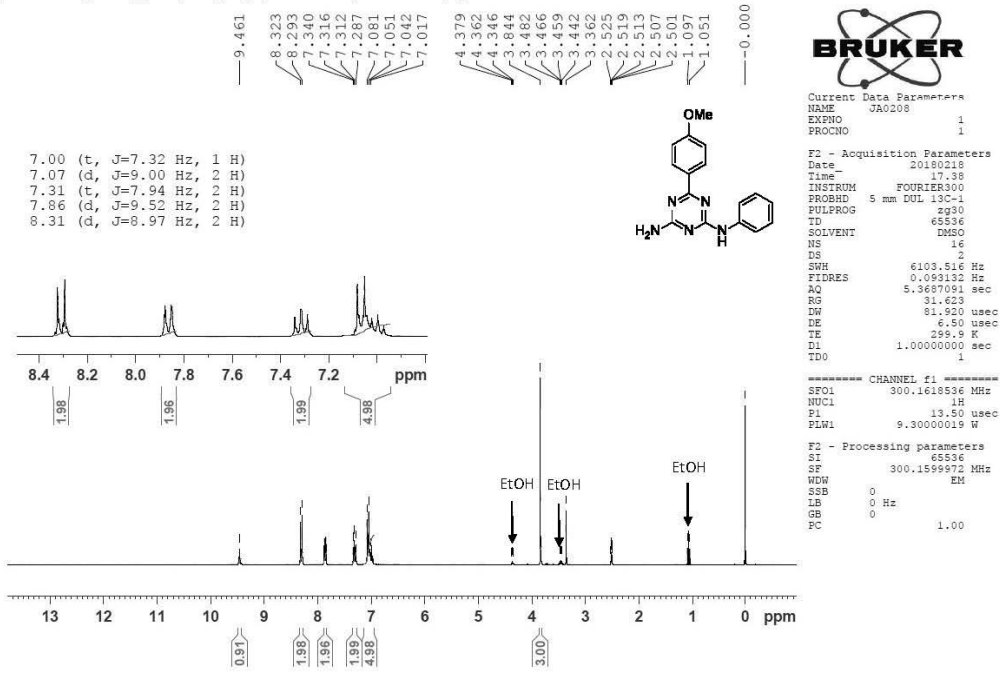

**6-(4-Methoxyphenyl)-N<sup>2</sup>-phenyl-1,3,5-triazine-2,4-diamine (8)**

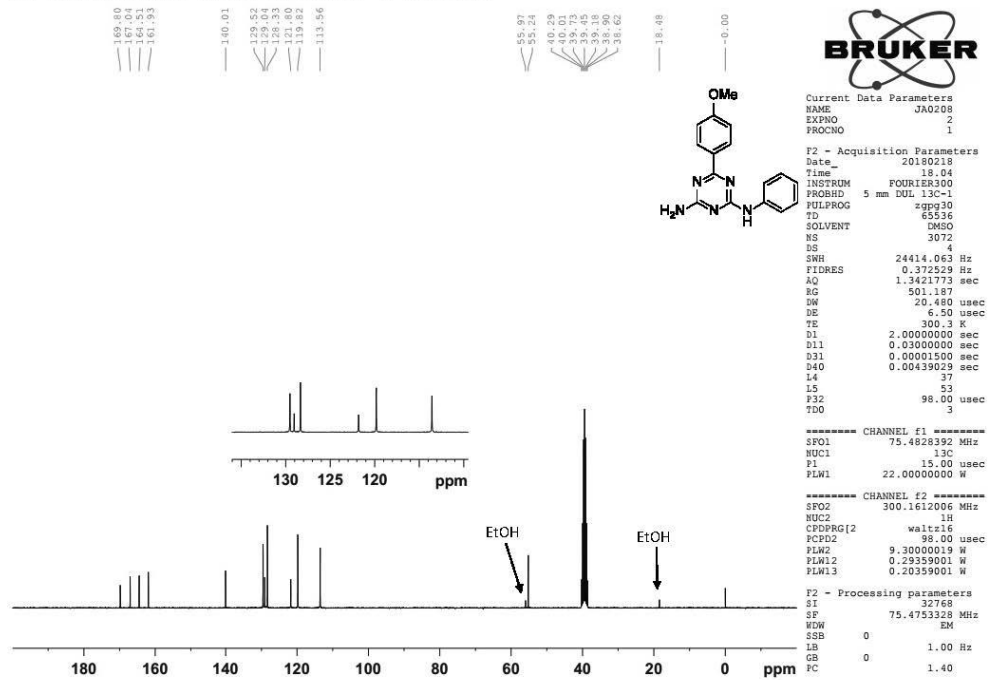

6-(4-Methoxyphenyl)-N<sup>2</sup>-(p-tolyl)-1,3,5-triazine-2,4-diamine (9)

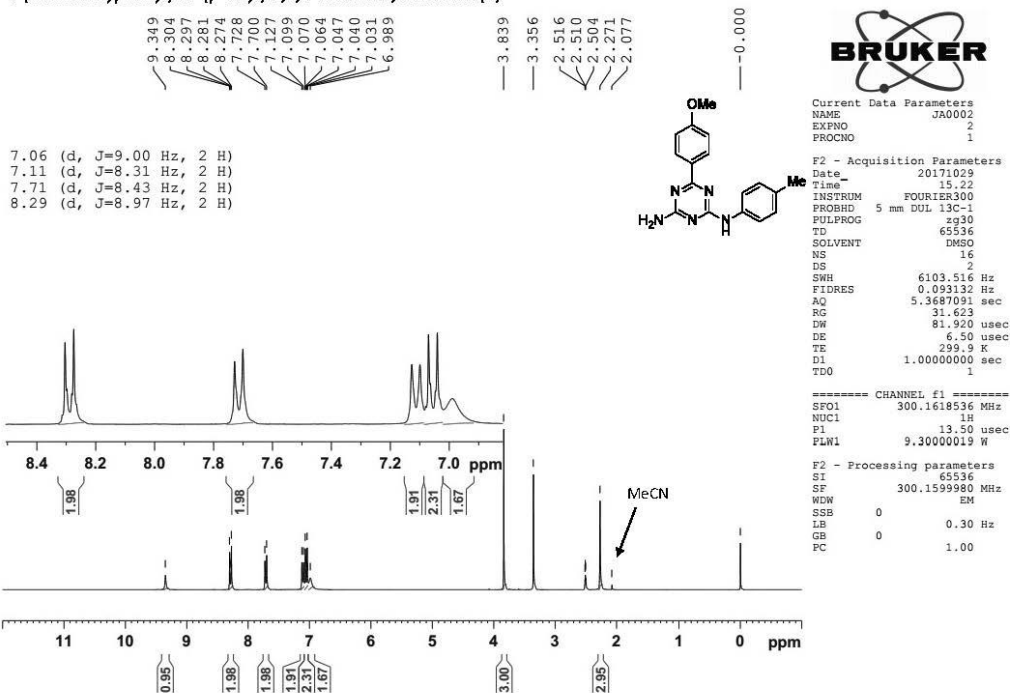

6-(4-Methoxyphenyl)-N<sup>2</sup>-(p-tolyl)-1,3,5-triazine-2,4-diamine (9)

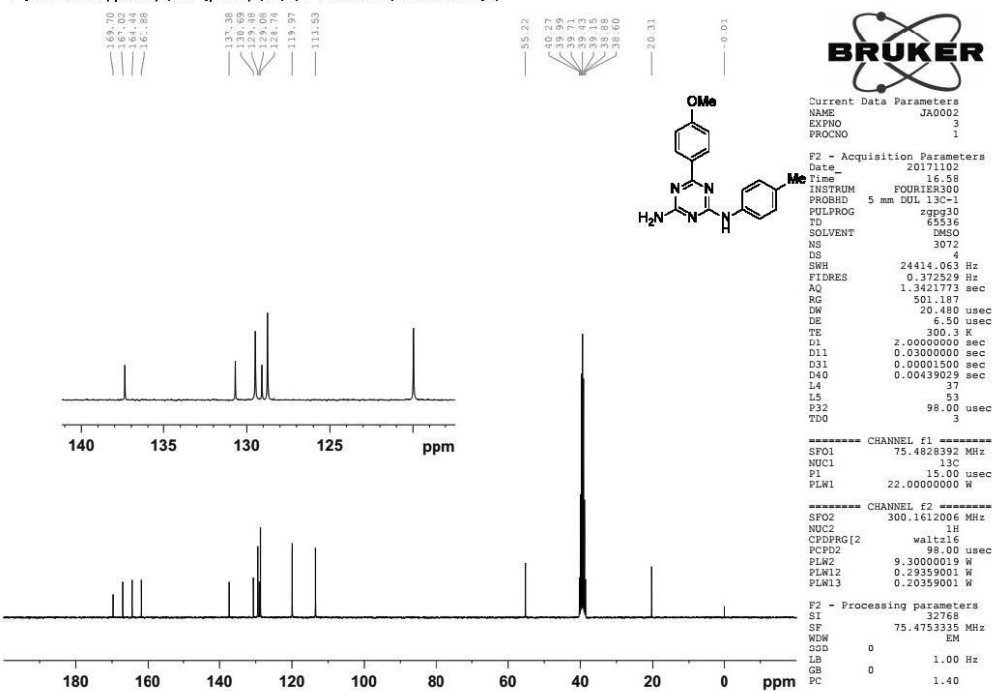

***N*<sup>2</sup>-Phenyl-6-(3,4,5-trimethoxyphenyl)-1,3,5-triazine-2,4-diamine (10)**

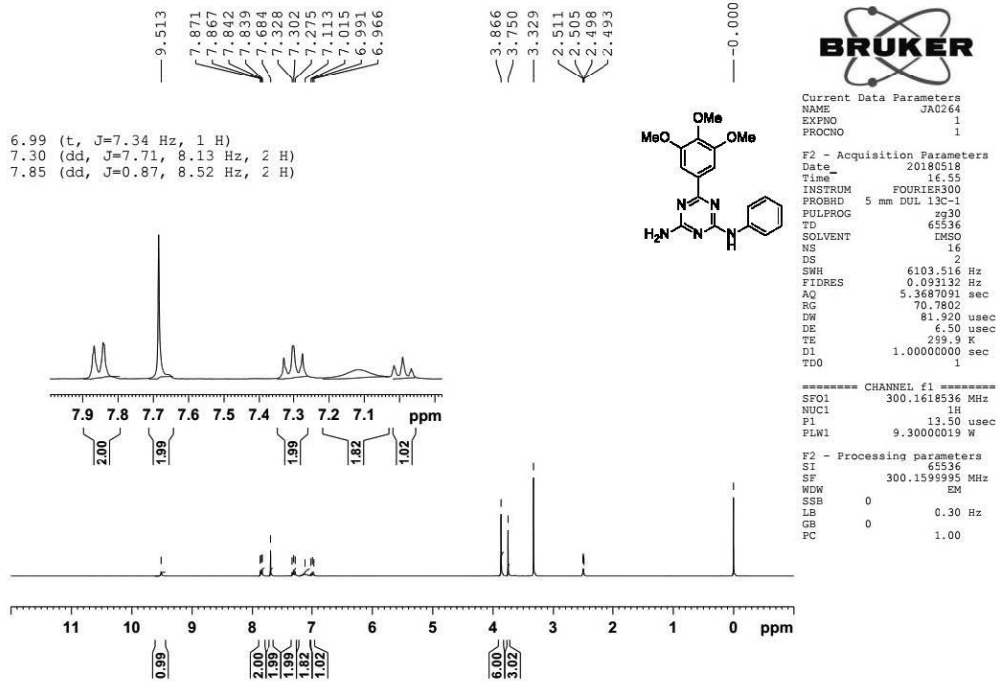

***N*<sup>2</sup>-Phenyl-6-(3,4,5-trimethoxyphenyl)-1,3,5-triazine-2,4-diamine (10)**

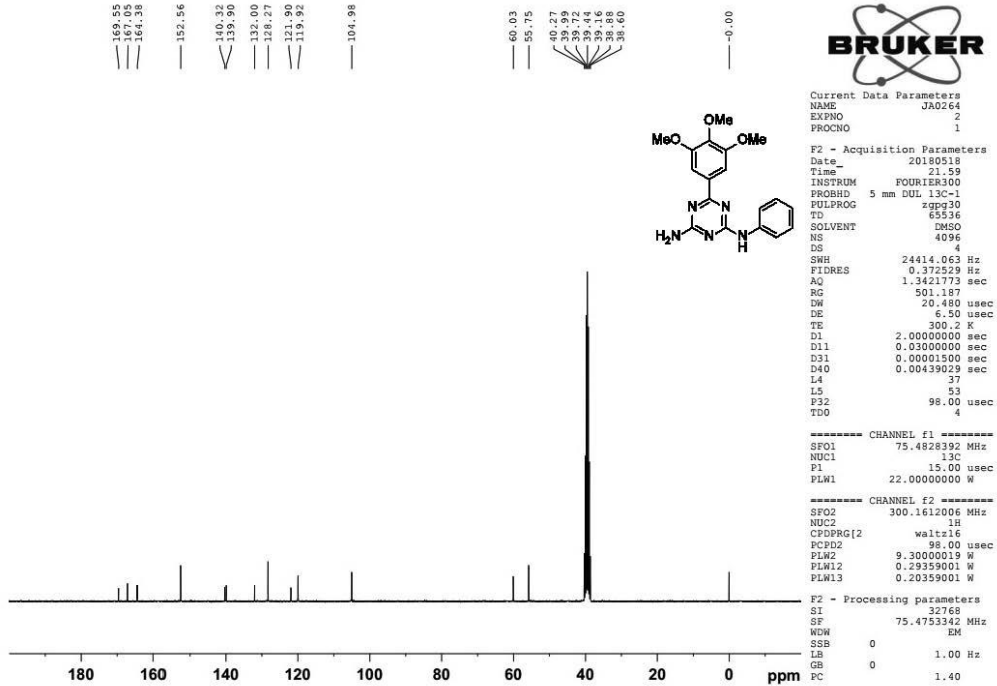

**N<sup>2</sup>-(2-Fluorophenyl)-6-(3,4,5-trimethoxyphenyl)-1,3,5-triazine-2,4-diamine (11)**

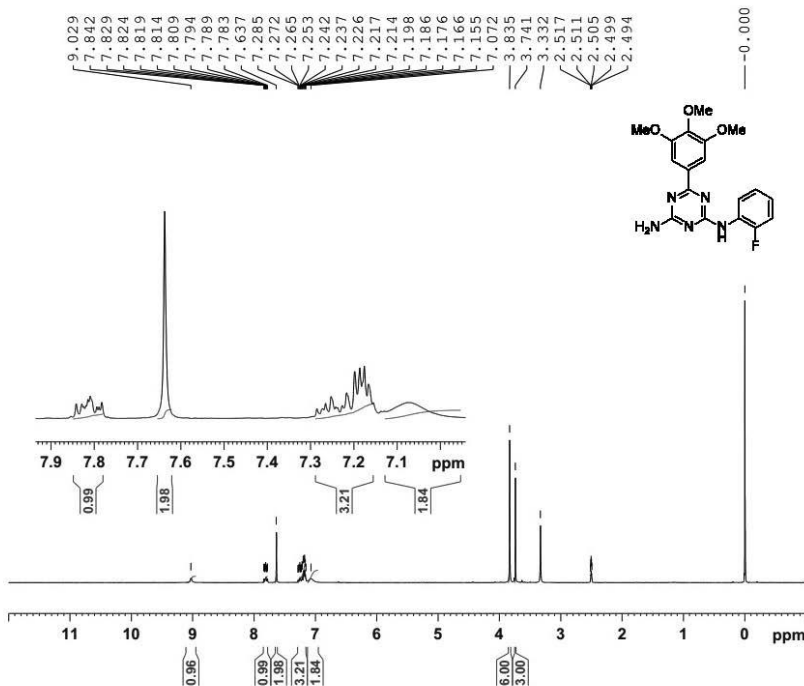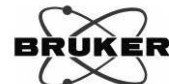

Current Data Parameters  
 NAME JA0089  
 EXPNO 1  
 PROCNO 1

F2 - Acquisition Parameters  
 Date\_ 20180519  
 Time 16.04  
 INSTRUM FOURIER300  
 PROBHD 5 mm DUL 13C-1  
 PULPROG zg30  
 TD 65536  
 SOLVENT DMSO  
 NS 16  
 DS 2  
 SWH 6103.516 Hz  
 FIDRES 0.093132 Hz  
 AQ 5.3687091 sec  
 RG 31.623  
 DW 81.920 usec  
 DE 6.50 usec  
 TE 300.2 K  
 D1 1.00000000 sec  
 TD0 1

----- CHANNEL f1 -----  
 SFO1 300.1618536 MHz  
 NUC1 1H  
 P1 13.50 usec  
 PLW1 9.30000019 W

F2 - Processing parameters  
 SI 65536  
 SF 300.1599993 MHz  
 WDW EM  
 SSB 0  
 LB 0.30 Hz  
 GB 0  
 PC 1.00

**N<sup>2</sup>-(2-Fluorophenyl)-6-(3,4,5-trimethoxyphenyl)-1,3,5-triazine-2,4-diamine (11)**

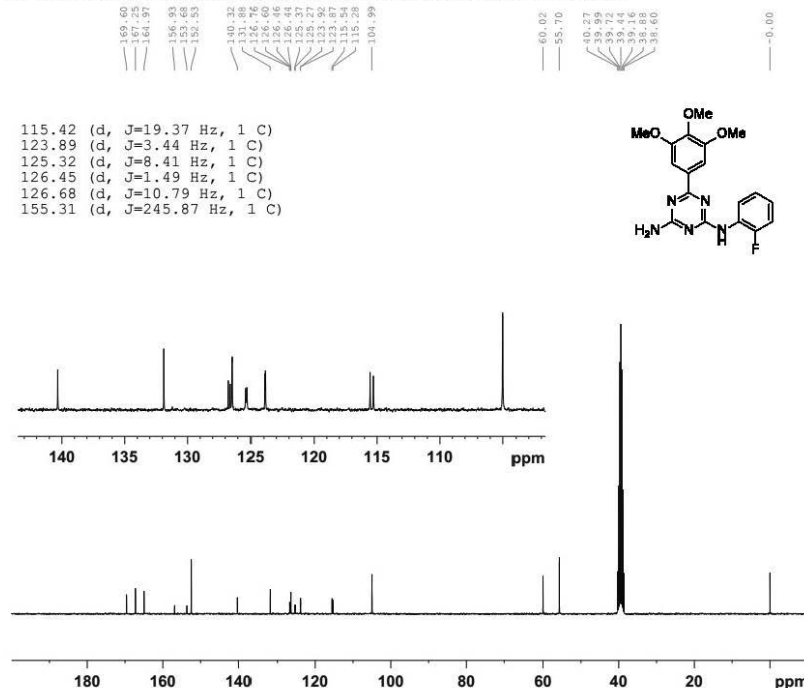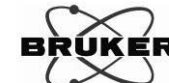

Current Data Parameters  
 NAME JA0089  
 EXPNO 2  
 PROCNO 1

F2 - Acquisition Parameters  
 Date\_ 20180522  
 Time 4.52  
 INSTRUM FOURIER300  
 PROBHD 5 mm DUL 13C-1  
 PULPROG zgpg30  
 TD 65536  
 SOLVENT DMSO  
 NS 4096  
 DS 4  
 SWH 24414.063 Hz  
 FIDRES 0.372529 Hz  
 AQ 1.3421773 sec  
 RG 501.187  
 DW 20.480 usec  
 DE 6.50 usec  
 TE 300.1 K  
 D1 2.00000000 sec  
 D11 0.03000000 sec  
 D31 0.00001500 sec  
 D40 0.00439029 sec  
 L4 37  
 L5 53  
 P32 98.00 usec  
 TD0 4

----- CHANNEL f1 -----  
 SFO1 75.482892 MHz  
 NUC1 13C  
 P1 15.00 usec  
 PLW1 22.00000000 W

----- CHANNEL f2 -----  
 SFO2 300.1612006 MHz  
 NUC2 1H  
 CPDPRG2 waltz16  
 PCPD2 98.00 usec  
 PLW2 9.30000019 W  
 PLW12 0.29359001 W  
 PLW13 0.20359001 W

F2 - Processing parameters  
 SI 32768  
 SF 75.4753335 MHz  
 WDW EM  
 SSB 0  
 LB 1.00 Hz  
 GB 0  
 PC 1.40

**N<sup>2</sup>-(2-Chlorophenyl)-6-(3,4,5-trimethoxyphenyl)-1,3,5-triazine-2,4-diamine (12)**

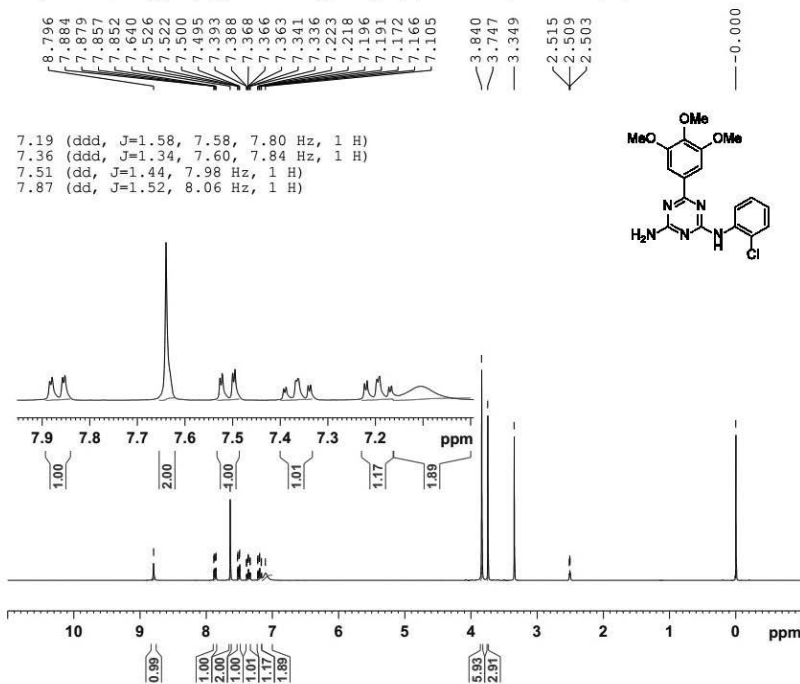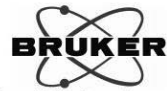

Current Data Parameters  
 NAME JA0088  
 EXPNO 1  
 PROCNO 1

F2 - Acquisition Parameters  
 Date\_ 20180530  
 Time 16.13  
 INSTRUM FOURIER300  
 PROBHD 5 mm DUL 13C-1  
 PULPROG zg30  
 TD 65536  
 SOLVENT DMSO  
 NS 16  
 DS 2  
 SWH 6103.516 Hz  
 FIDRES 0.093132 Hz  
 AQ 5.3687091 sec  
 RG 31.623  
 DW 81.920 usec  
 DE 6.50 usec  
 TE 300.0 K  
 D1 1.00000000 sec  
 TD0 1

==== CHANNEL f1 =====  
 SFO1 300.1618536 MHz  
 NUC1 1H  
 P1 13.50 usec  
 PLW1 9.30000019 W

F2 - Processing parameters  
 SI 65536  
 SF 300.1599982 MHz  
 WDW EM  
 SSB 0  
 LB 0.30 Hz  
 GB 0  
 PC 1.00

**N<sup>2</sup>-(2-Chlorophenyl)-6-(3,4,5-trimethoxyphenyl)-1,3,5-triazine-2,4-diamine (12)**

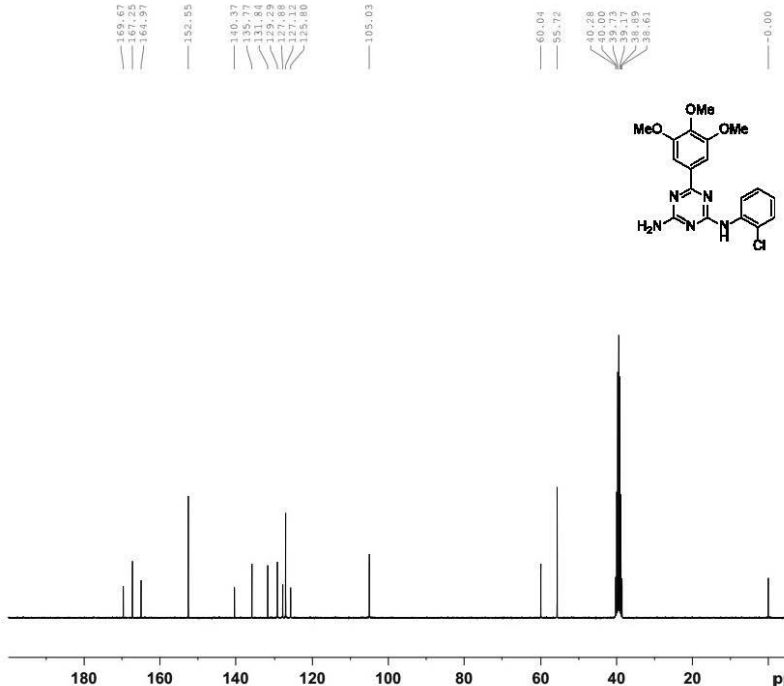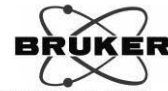

Current Data Parameters  
 NAME JA0088  
 EXPNO 2  
 PROCNO 1

F2 - Acquisition Parameters  
 Date\_ 20180530  
 Time 23.49  
 INSTRUM FOURIER300  
 PROBHD 5 mm DUL 13C-1  
 PULPROG zgpg30  
 TD 65536  
 SOLVENT DMSO  
 NS 4  
 DS 4  
 SWH 24414.063 Hz  
 FIDRES 0.372529 Hz  
 AQ 1.3421773 sec  
 RG 501.187  
 DW 20.480 usec  
 DE 6.50 usec  
 TE 300.1 K  
 D1 2.00000000 sec  
 D11 0.03000000 sec  
 D31 0.00001500 sec  
 D40 0.00439029 sec  
 L4 37  
 L5 53  
 P32 98.00 usec  
 TD0 4

==== CHANNEL f1 =====  
 SFO1 75.4828392 MHz  
 NUC1 13C  
 P1 15.00 usec  
 PLW1 22.00000000 W

==== CHANNEL f2 =====  
 SFO2 300.1612006 MHz  
 NUC2 1H  
 CPDPRG2 waltz16  
 EPCPD2 98.00 usec  
 PLM2 9.30000019 W  
 PLW12 0.29359001 W  
 PLW13 0.20359001 W

F2 - Processing parameters  
 SI 32768  
 SF 75.4753327 MHz  
 WDW EM  
 SSB 0  
 LB 0.50 Hz  
 GB 0  
 PC 1.40

***N*<sup>2</sup>-(2-Methoxyphenyl)-6-(3,4,5-trimethoxyphenyl)-1,3,5-triazine-2,4-diamine (13)**

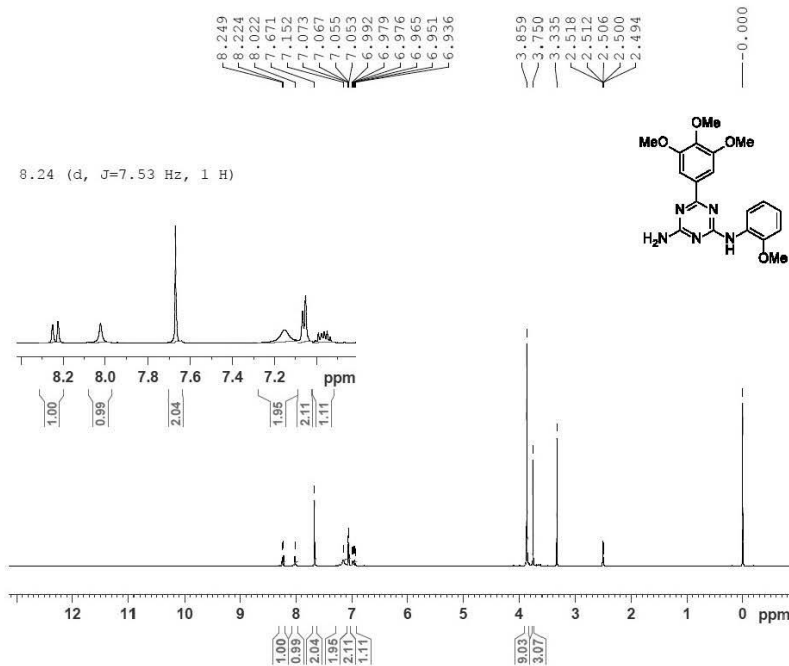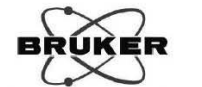

Current Data Parameters  
 NAME JA0090  
 EXPNO 1  
 PROCNO 1

F2 - Acquisition Parameters  
 Date\_ 20180530  
 Time 16.09  
 INSTRUM FOURIER300  
 PROBHD 5 mm DUL 13C-1  
 PULPROG zgpg30  
 TD 65536  
 SOLVENT DMSO  
 NS 16  
 DS 2  
 SWH 6103.516 Hz  
 FIDRES 0.099132 Hz  
 AQ 5.3687091 sec  
 RG 31.623  
 DW 81.920 usec  
 DE 6.50 usec  
 TE 299.9 K  
 D1 1.00000000 sec  
 TDO

==== CHANNEL f1 =====  
 SFO1 300.1618536 MHz  
 NUC1 1H  
 P1 13.50 usec  
 PLW1 9.30000019 W

F2 - Processing parameters  
 SI 65536  
 SF 300.1599982 MHz  
 WDW EM  
 SSB 0  
 LB 0.30 Hz  
 GB 0  
 PC 1.00

***N*<sup>2</sup>-(2-Methoxyphenyl)-6-(3,4,5-trimethoxyphenyl)-1,3,5-triazine-2,4-diamine (13)**

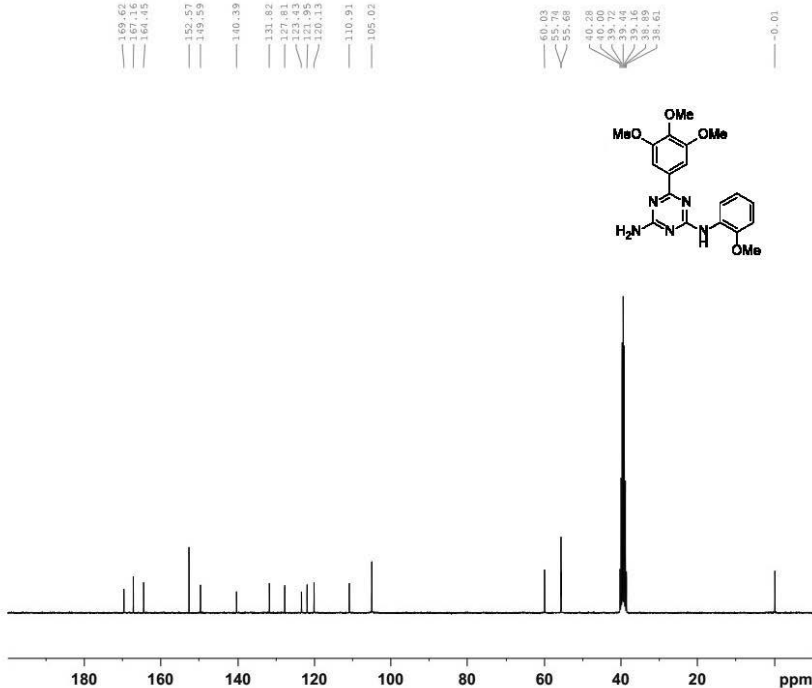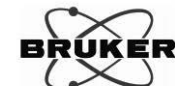

Current Data Parameters  
 NAME JA0090  
 EXPNO 2  
 PROCNO 1

F2 - Acquisition Parameters  
 Date\_ 20180531  
 Time 3.44  
 INSTRUM FOURIER300  
 PROBHD 5 mm DUL 13C-1  
 PULPROG zgpg30  
 TD 65536  
 SOLVENT DMSO  
 NS 4096  
 DS 4  
 SWH 24414.063 Hz  
 FIDRES 0.372529 Hz  
 AQ 1.3421773 sec  
 RG 501.187  
 DW 20.480 usec  
 DE 6.50 usec  
 TE 300.1 K  
 D1 2.00000000 sec  
 D11 0.03000000 sec  
 D31 0.00001500 sec  
 D40 0.00439029 sec  
 L4 37  
 L5 53  
 P32 98.00 usec  
 TDO 4

==== CHANNEL f1 =====  
 SFO1 75.4828392 MHz  
 NUC1 13C  
 P1 15.00 usec  
 PLW1 22.00000000 W

==== CHANNEL f2 =====  
 SFO2 300.1612006 MHz  
 NUC2 1H  
 CPDPRG[2] waltz16  
 PCPD2 98.00 usec  
 P1[2] 9.30000019 W  
 PLW12 0.29359001 W  
 PLW13 0.20359001 W

F2 - Processing parameters  
 SI 32768  
 SF 75.4753335 MHz  
 WDW EM  
 SSB 0  
 LB 1.00 Hz  
 GB 0  
 PC 1.40



**N<sup>2</sup>-{3-Chlorophenyl}-6-(3,4,5-trimethoxyphenyl)-1,3,5-triazine-2,4-diamine (14)**

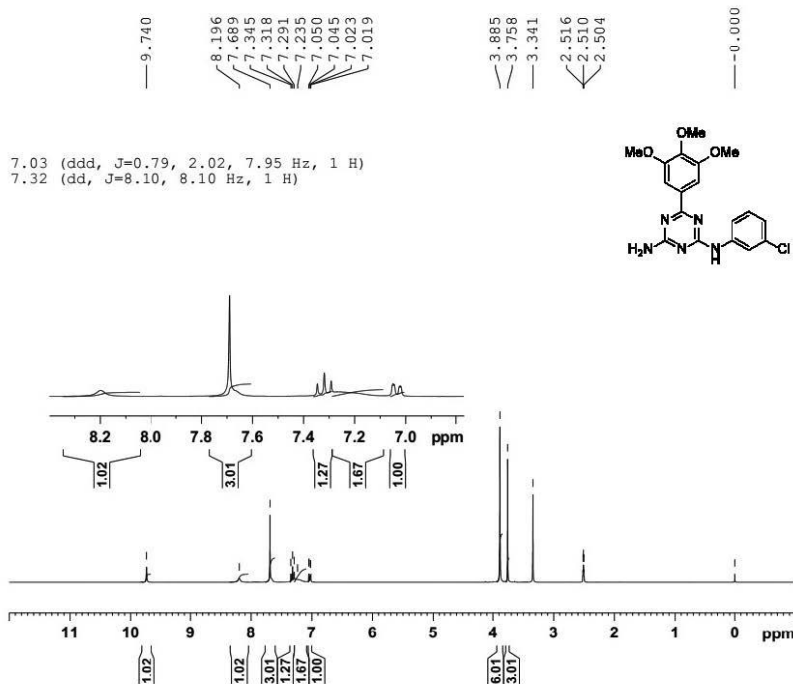

**BRUKER**

Current Data Parameters  
 NAME JA0046  
 EXPNO 3  
 PROCNO 1

F2 - Acquisition Parameters  
 Date\_ 20190408  
 Time 22.10  
 INSTRUM FOURIER300  
 PROBHD 5 mm DUL 13C-1  
 PULPROG zg30  
 TD 65536  
 SOLVENT DMSO  
 NS 16  
 DS 2  
 SWH 6103.516 Hz  
 FIDRES 0.093132 Hz  
 AQ 5.3687091 sec  
 RG 61.5237  
 DW 81.920 usec  
 DE 6.50 usec  
 TE 298.1 K  
 D1 1.00000000 sec  
 TDO 1

==== CHANNEL f1 =====  
 SFO1 300.1618536 MHz  
 NUC1 1H  
 P1 13.50 usec  
 PLW1 9.30000019 W

F2 - Processing parameters  
 SI 65536  
 SF 300.1599978 MHz  
 WDW EM  
 SSB 0  
 LB 0.30 Hz  
 GB 0  
 PC 1.00

**N<sup>2</sup>-{3-Chlorophenyl}-6-(3,4,5-trimethoxyphenyl)-1,3,5-triazine-2,4-diamine (14)**

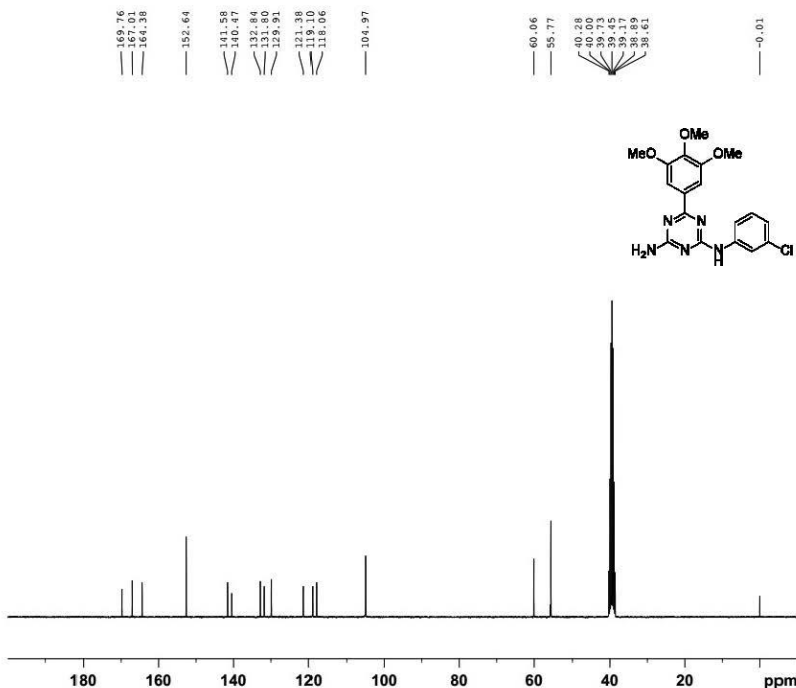

**BRUKER**

Current Data Parameters  
 NAME JA0046  
 EXPNO 2  
 PROCNO 1

F2 - Acquisition Parameters  
 Date\_ 20180629  
 Time 18.35  
 INSTRUM FOURIER300  
 PROBHD 5 mm DUL 13C-1  
 PULPROG zgpg30  
 TD 65536  
 SOLVENT DMSO  
 NS 5120  
 DS 4  
 SWH 24414.063 Hz  
 FIDRES 0.372529 Hz  
 AQ 1.3421773 sec  
 RG 501.187  
 DW 20.480 usec  
 DE 6.50 usec  
 TE 300.3 K  
 D1 2.00000000 sec  
 D11 0.03000000 sec  
 D31 0.00001500 sec  
 D40 0.00439029 sec  
 I4 37  
 L5 53  
 P32 98.00 usec  
 TDO 5

==== CHANNEL f1 =====  
 SFO1 75.4828392 MHz  
 NUC1 13C  
 P1 15.00 usec  
 PLW1 22.00000000 W

==== CHANNEL f2 =====  
 SFO2 300.1612006 MHz  
 NUC2 1H  
 CPDPRG[2] waltz16  
 PCPD2 98.00 usec  
 PLW2 9.30000019 W  
 PLW12 0.29359001 W  
 PLW13 0.20359001 W

F2 - Processing parameters  
 SI 32768  
 SF 75.4753320 MHz  
 WDW EM  
 SSB 0  
 LB 1.00 Hz  
 GB 0  
 PC 1.40

***N*<sup>2</sup>-(*m*-Tolyl)-6-(3,4,5-trimethoxyphenyl)-1,3,5-triazine-2,4-diamine (15)**

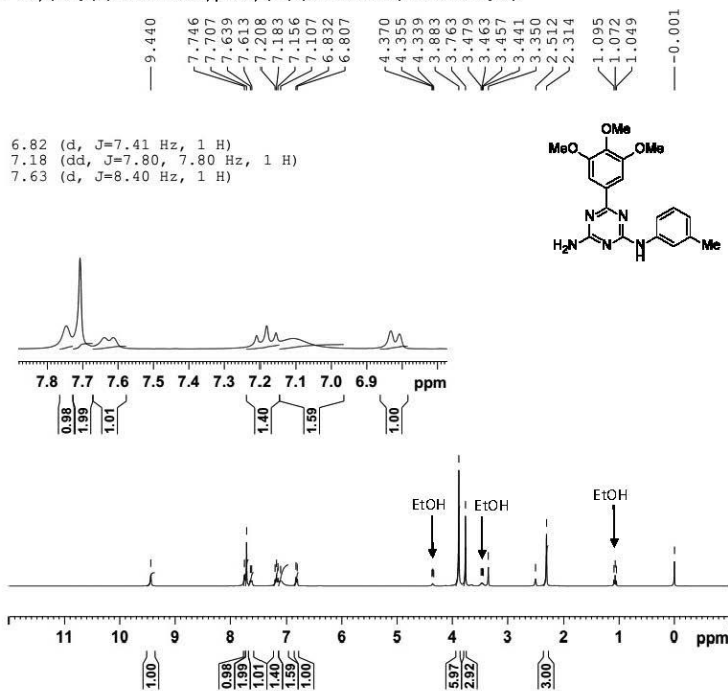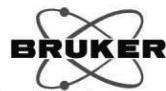

Current Data Parameters  
 NAME JA0045  
 EXPNO 3  
 PROCNO 1

F2 - Acquisition Parameters  
 Date\_ 20180703  
 Time 12.49  
 INSTRUM FOURIER300  
 PROBHD 5 mm DUL 13C-1  
 PULPROG zg30  
 TD 65536  
 SOLVENT DMSO  
 NS 16  
 DS 2  
 SWH 6103.516 Hz  
 FIDRES 0.093132 Hz  
 AQ 5.3687091 sec  
 RG 31.623  
 DW 81.920 usec  
 DE 6.50 usec  
 TE 300.1 K  
 D1 1.0000000 sec  
 TD0 1

==== CHANNEL f1 =====  
 SF01 300.1618536 MHz  
 NUC1 1H  
 P1 13.50 usec  
 PLW1 9.3000019 W

F2 - Processing parameters  
 SI 65536  
 SF 300.1599968 MHz  
 WDW EM  
 SSB 0  
 LB 1.00 Hz  
 GB 0  
 PC 1.00

***N*<sup>2</sup>-(*m*-Tolyl)-6-(3,4,5-trimethoxyphenyl)-1,3,5-triazine-2,4-diamine (15)**

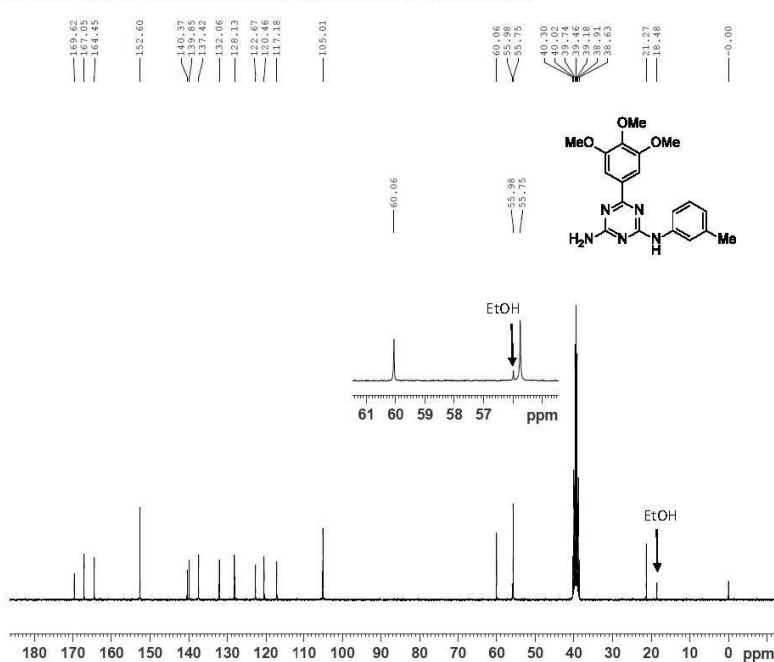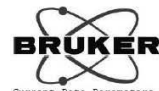

Current Data Parameters  
 NAME JA0045  
 EXPNO 4  
 PROCNO 1

F2 - Acquisition Parameters  
 Date\_ 20180703  
 Time 15.48  
 INSTRUM FOURIER300  
 PROBHD 5 mm DUL 13C-1  
 PULPROG zgpg30  
 TD 65536  
 SOLVENT DMSO  
 NS 4168  
 DS 4  
 SWH 24414.063 Hz  
 FIDRES 0.373259 Hz  
 AQ 1.3421773 sec  
 RG 501.197  
 DW 20.450 usec  
 DE 6.50 usec  
 TE 300.3 K  
 D1 2.0000000 sec  
 D11 0.0300000 sec  
 D12 0.0000150 sec  
 D13 0.0043902 sec  
 L4 37  
 L5 53  
 F32 98.00 usec  
 TD0 4

==== CHANNEL f1 =====  
 SF01 75.4828382 MHz  
 NUC1 13C  
 P1 15.00 usec  
 PLW1 22.0000000 W

==== CHANNEL f2 =====  
 SF02 300.1612006 MHz  
 NUC2 1H  
 CPDPRG2 waltz16  
 FREQ2 95.00 usec  
 PLW2 9.3000019 W  
 PLW12 0.29359001 W  
 PLW13 0.20355001 W

F2 - Processing parameters  
 SI 32768  
 SF 75.4753318 MHz  
 WDW EM  
 SSB 0  
 LB 1.00 Hz  
 GB 0  
 PC 1.40

**N<sup>2</sup>-(4-Chlorophenyl)-6-(3,4,5-trimethoxyphenyl)-1,3,5-triazine-2,4-diamine (16)**

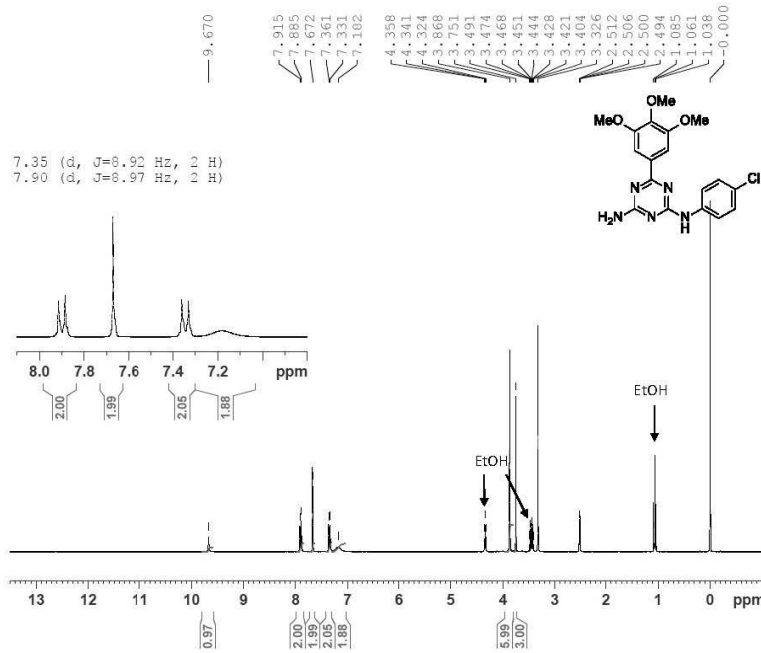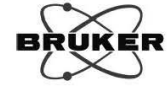

Current Data Parameters  
 NAME JA0266  
 EXNO 1  
 PROCNO 1

F2 - Acquisition Parameters  
 Date 20180517  
 Time 16.14  
 INSTRUM FOURIER300  
 PROBD 5 mm DUL 13C-1  
 PULPROG zgpg30  
 TD 65536  
 SOLVENT DMSO  
 NS 16  
 DS 4  
 SWH 6103.516 Hz  
 FIDRES 0.093133 Hz  
 AQ 5.3687091 sec  
 RG 69.5016  
 DW 51.820 usec  
 DE 6.50 usec  
 TE 300.2 K  
 DL 1.00000000 sec  
 TDO 1

===== CHANNEL f1 =====  
 SF01 300.1618336 MHz  
 NUC1 13C  
 P1 13.50 usec  
 PLW1 9.30000019 W

F2 - Processing parameters  
 SI 65536  
 SF 300.1599893 MHz  
 WDW EM  
 SSB 0  
 LB 0.30 Hz  
 GB 0  
 PC 1.00

**N<sup>2</sup>-(4-Chlorophenyl)-6-(3,4,5-trimethoxyphenyl)-1,3,5-triazine-2,4-diamine (16)**

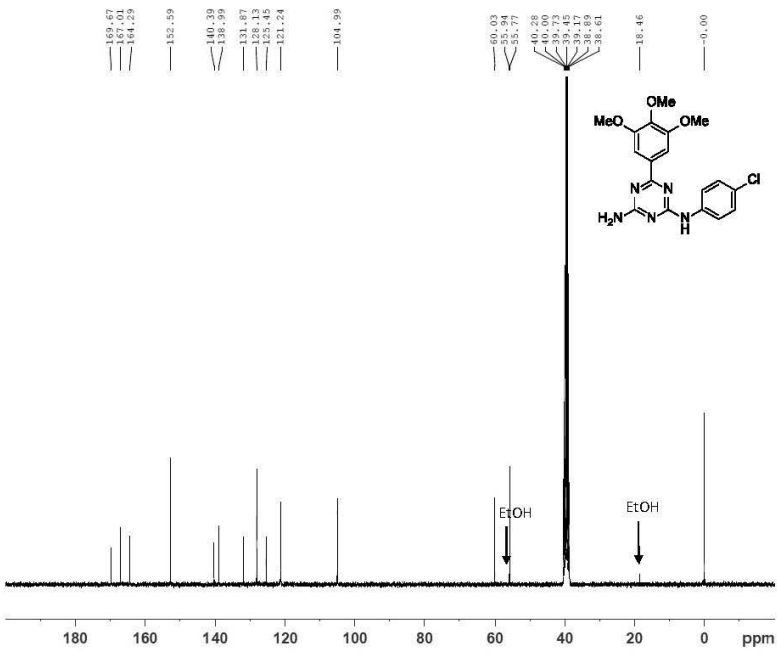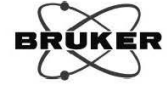

Current Data Parameters  
 NAME JA0266  
 EXNO 1  
 PROCNO 1

F2 - Acquisition Parameters  
 Date 20180529  
 Time 19.23  
 INSTRUM FOURIER300  
 PROBD 5 mm DUL 13C-1  
 PULPROG zgpg30  
 TD 65536  
 SOLVENT DMSO  
 NS 3072  
 DS 4  
 SWH 24414.063 Hz  
 FIDRES 0.372529 Hz  
 AQ 1.8421773 sec  
 RG 501.187  
 DW 20.480 usec  
 DE 6.50 usec  
 TE 300.2 K  
 DL 2.00000000 sec  
 DL1 0.03000000 sec  
 D31 0.00015000 sec  
 D40 0.00439029 sec  
 L4 37  
 L5 53  
 P32 98.03 usec  
 TDO 1

===== CHANNEL f1 =====  
 SF01 75.4828382 MHz  
 NUC1 13C  
 P1 15.00 usec  
 PLW1 22.00000000 W

===== CHANNEL f2 =====  
 SF02 300.1612006 MHz  
 NUC2 1H  
 CPDPRG2 waltz16  
 PCPD2 98.00 usec  
 PLM2 9.30000019 W  
 PLW2 0.29359001 W  
 PLW3 0.20359001 W

F2 - Processing parameters  
 SI 32768  
 SF 75.4753338 MHz  
 WDW EM  
 SSB 0  
 LB 1.00 Hz  
 GB 0  
 PC 1.40

**N<sup>2</sup>-(4-Bromophenyl)-6-(3,4,5-trimethoxyphenyl)-1,3,5-triazine-2,4-diamine (17)**

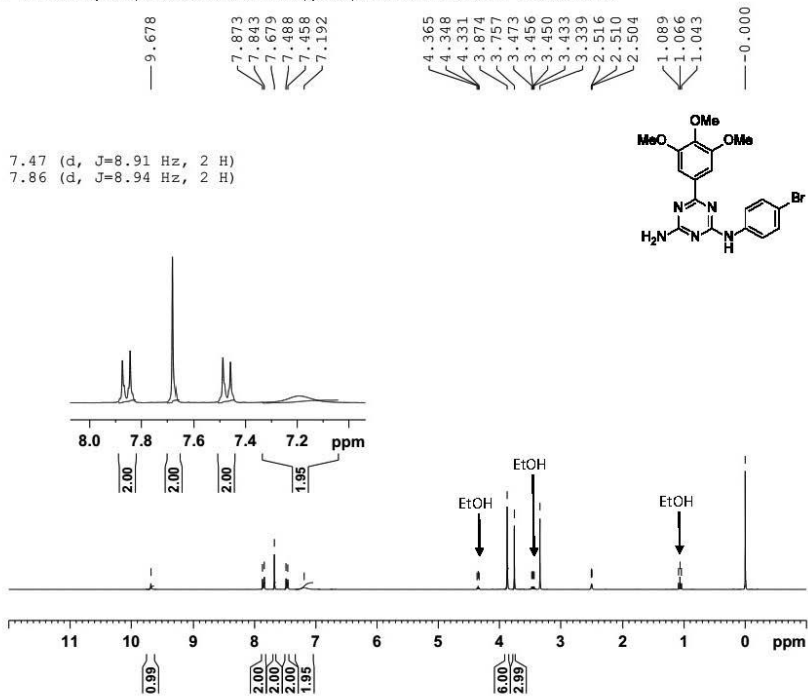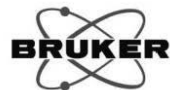

Current Data Parameters  
 NAME JA0269  
 EXPNO 3  
 PROCNO 1

F2 - Acquisition Parameters  
 Date\_ 20180529  
 Time 16.27  
 INSTRUM FOURIER300  
 PROBHD 5 mm DUL 13C-1  
 PULPROG zg30  
 TD 65536  
 SOLVENT DMSO  
 NS 16  
 DS 2  
 SWH 6103.516 Hz  
 FIDRES 0.093132 Hz  
 AQ 5.3687091 sec  
 RG 47.92  
 EW 81.920 usec  
 DE 6.50 usec  
 TE 299.9 K  
 D1 1.0000000 sec  
 TD0 1

==== CHANNEL f1 =====  
 SFO1 300.1618536 Mhz  
 NUC1 1H  
 P1 13.50 usec  
 PLW1 9.30000019 W

F2 - Processing parameters  
 SI 65536  
 SF 300.1599978 Mhz  
 WDW EM  
 SSB 0  
 LB 0.30 Hz  
 GB 0  
 PC 1.00

**N<sup>2</sup>-(4-Bromophenyl)-6-(3,4,5-trimethoxyphenyl)-1,3,5-triazine-2,4-diamine (17)**

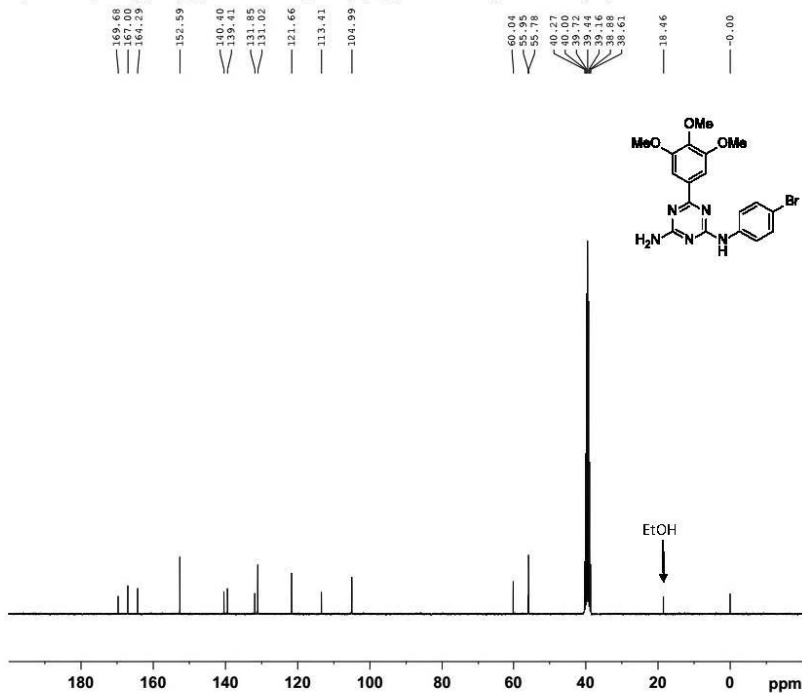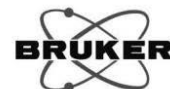

Current Data Parameters  
 NAME JA0269  
 EXPNO 2  
 PROCNO 1

F2 - Acquisition Parameters  
 Date\_ 20180521  
 Time 20.03  
 INSTRUM FOURIER300  
 PROBHD 5 mm DUL 13C-1  
 PULPROG zgpg30  
 TD 65536  
 SOLVENT DMSO  
 NS 4096  
 DS 4  
 SWH 24414.063 Hz  
 FIDRES 0.372529 Hz  
 AQ 1.3421773 sec  
 RG 501.187  
 DW 20.480 usec  
 DE 6.50 usec  
 TE 300.2 K  
 D1 2.0000000 sec  
 D11 0.0300000 sec  
 D31 0.0000150 sec  
 D40 0.00439029 sec  
 L4 37  
 L5 53  
 P32 98.00 usec  
 TD0 4

==== CHANNEL f1 =====  
 SFO1 75.4828392 Mhz  
 NUC1 13C  
 P1 15.00 usec  
 PLW1 22.00000000 W

==== CHANNEL f2 =====  
 SFO2 300.1612006 Mhz  
 NUC2 1H  
 CPDPRG[2] waltz16  
 PCPD2 98.00 usec  
 PLW2 9.30000019 W  
 PLW12 0.29359001 W  
 PLW13 0.20359001 W

F2 - Processing parameters  
 SI 32768  
 SF 75.4753335 Mhz  
 WDW EM  
 SSB 0  
 LB 1.00 Hz  
 GB 0  
 PC 1.40

***N*<sup>2</sup>-(*p*-Tolyl)-6-(3,4,5-trimethoxyphenyl)-1,3,5-triazine-2,4-diamine (18)**

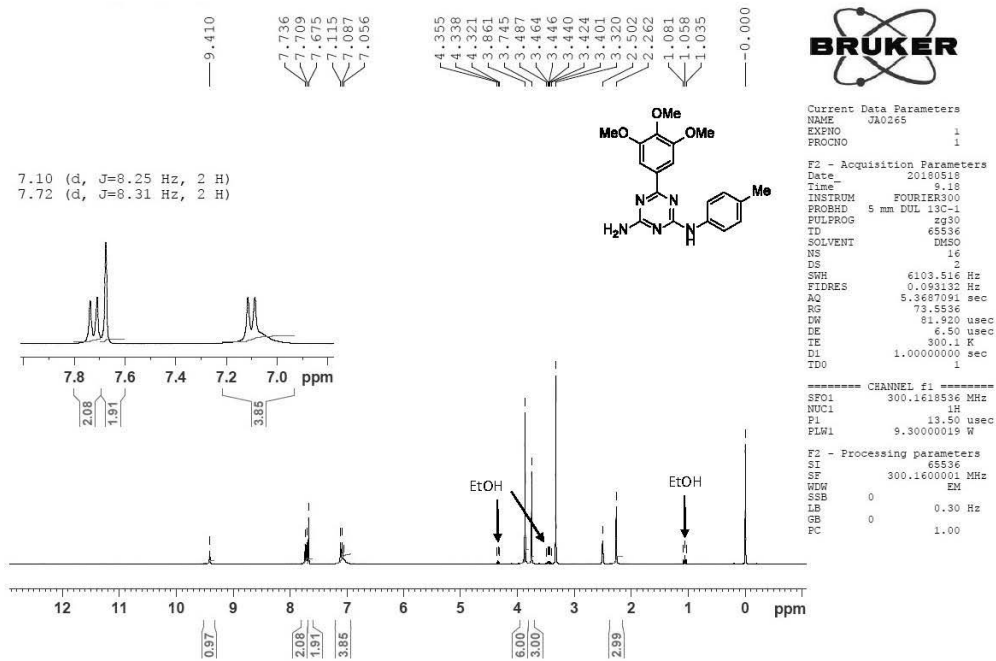

***N*<sup>2</sup>-(*p*-Tolyl)-6-(3,4,5-trimethoxyphenyl)-1,3,5-triazine-2,4-diamine (18)**

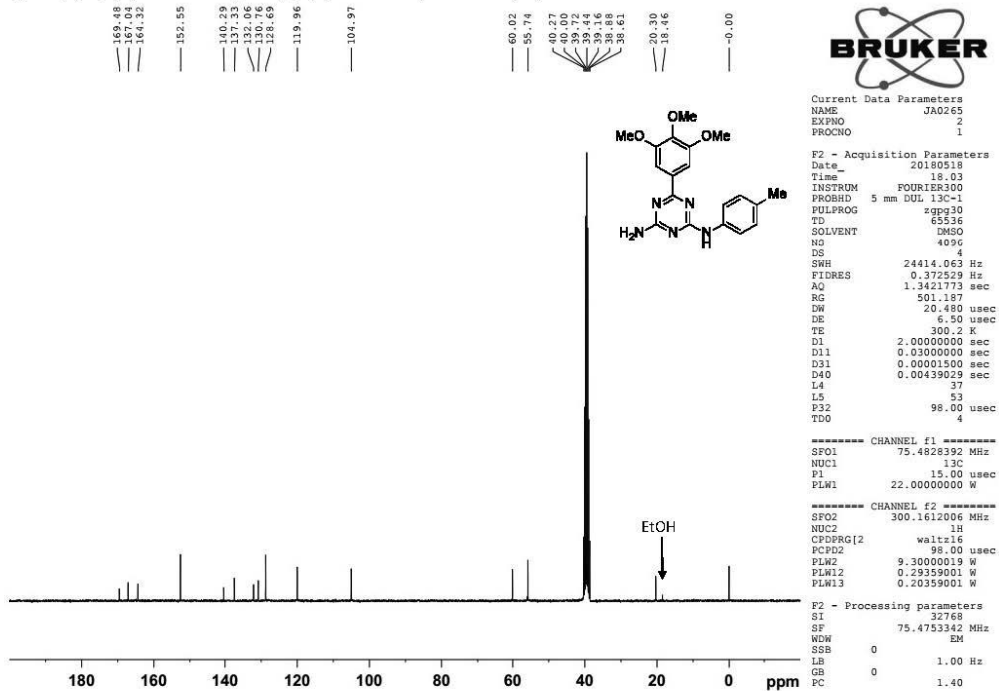

***N*<sup>2</sup>-(4-Methoxyphenyl)-6-(3,4,5-trimethoxyphenyl)-1,3,5-triazine-2,4-diamine (19)**

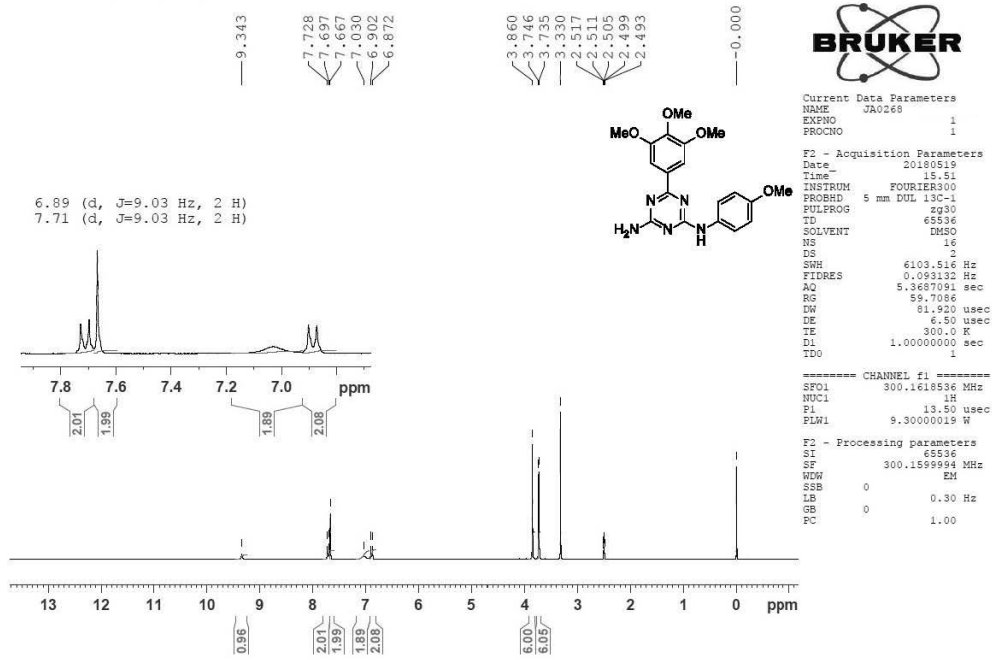

***N*<sup>2</sup>-(4-Methoxyphenyl)-6-(3,4,5-trimethoxyphenyl)-1,3,5-triazine-2,4-diamine (19)**

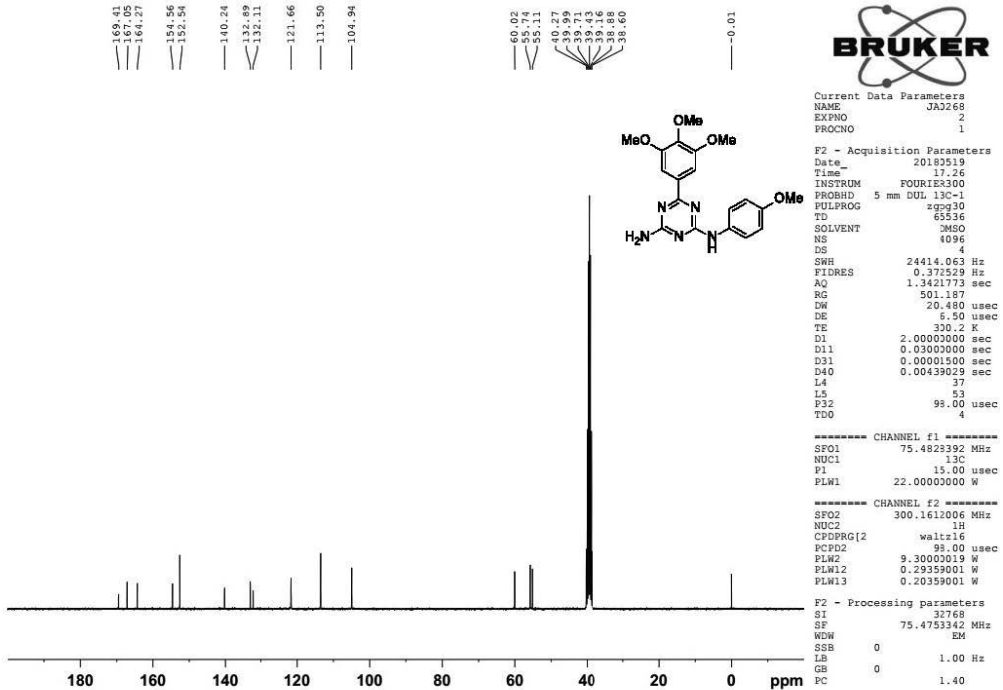

***N*<sup>2</sup>-(4-(Trifluoromethoxy)phenyl)-6-(3,4,5-trimethoxyphenyl)-1,3,5-triazine-2,4-diamine (20)**

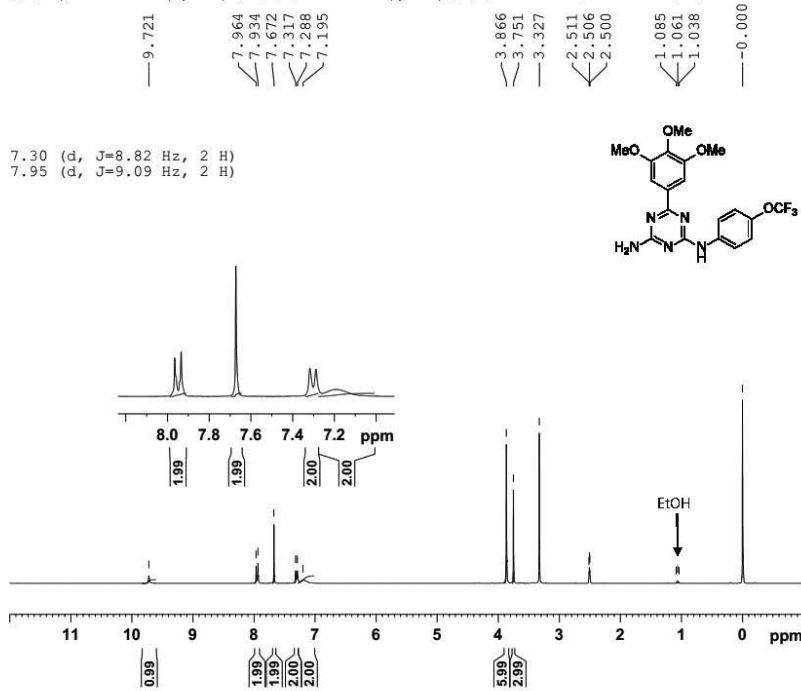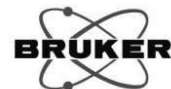

Current Data Parameters  
NAME JA0270  
EXPNO 1  
PROCNO 1

F2 - Acquisition Parameters  
Date\_ 20180530  
Time\_ 16.18  
INSTRUM FOURIER300  
PROBHD 5 mm DUL 13C-1  
PULPROG zgpg30  
TD 65536  
SOLVENT DMSO  
NS 16  
DS 2  
SWH 6103.516 Hz  
FIDRES 0.093132 Hz  
AQ 5.3687091 sec  
RG 67.8797  
DW 81.920 usec  
DE 6.50 usec  
TE 300.1 K  
TD0 1.00000000 sec  
TD0 1

===== CHANNEL f1 =====  
SFO1 300.1618536 MHz  
NUC1 1H  
P1 13.50 usec  
PLW1 9.30000019 W

F2 - Processing parameters  
SI 65536  
SF 300.1599993 MHz  
WDW EM  
SSB 0  
LB 0.30 Hz  
GB 0  
PC 1.00

***N*<sup>2</sup>-(4-(Trifluoromethoxy)phenyl)-6-(3,4,5-trimethoxyphenyl)-1,3,5-triazine-2,4-diamine (20)**

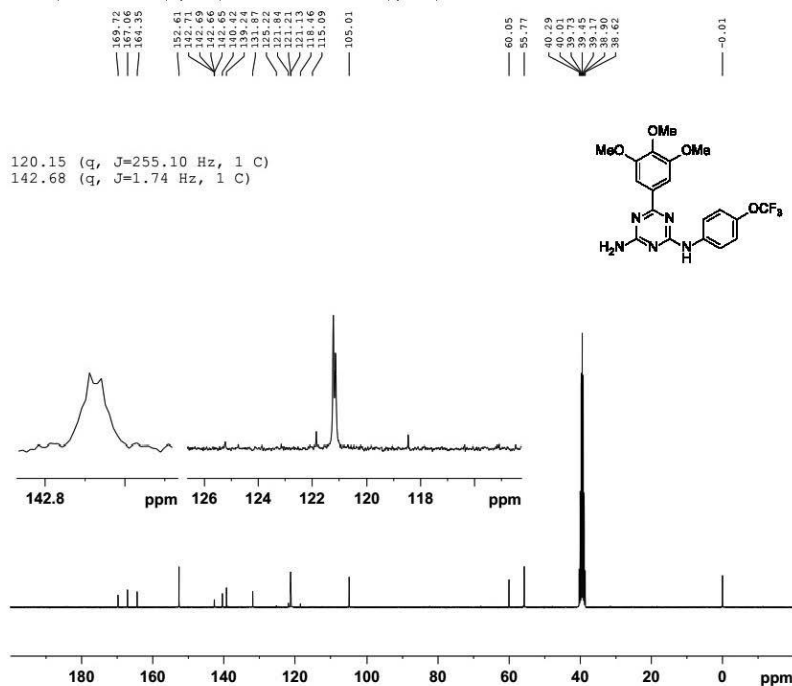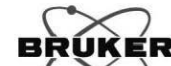

Current Data Parameters  
NAME JA0270  
EXPNO 2  
PROCNO 1

F2 - Acquisition Parameters  
Date\_ 20180602  
Time\_ 15.21  
INSTRUM FOURIER300  
PROBHD 5 mm DUL 13C-1  
PULPROG zgpg30  
TD 65536  
SOLVENT DMSO  
NS 4096  
DS 4  
SWH 24414.063 Hz  
FIDRES 0.372529 Hz  
AQ 1.3421773 sec  
RG 501.187  
DW 20.480 usec  
DE 6.50 usec  
TE 300.2 K  
D1 2.00000000 sec  
D11 0.03000000 sec  
D31 0.00001500 sec  
D40 0.00439029 sec  
L4 37  
L5 53  
P32 98.00 usec  
TD0 4

===== CHANNEL f1 =====  
SFO1 75.4828392 MHz  
NUC1 13C  
P1 15.00 usec  
PLW1 22.00000000 W

===== CHANNEL f2 =====  
SFO2 300.1612006 MHz  
NUC2 1H  
PCPD2 waitz16  
PULP2 98.00 usec  
PLW2 9.30000019 W  
PLW12 0.29359001 W  
PLW13 0.20359001 W

F2 - Processing parameters  
SI 32768  
SF 75.4753320 MHz  
WDW EM  
SSB 0  
LB 1.00 Hz  
GB 0  
PC 1.40

**N<sup>2</sup>-(4-Isopropylphenyl)-6-(3,4,5-trimethoxyphenyl)-1,3,5-triazine-2,4-diamine (21)**

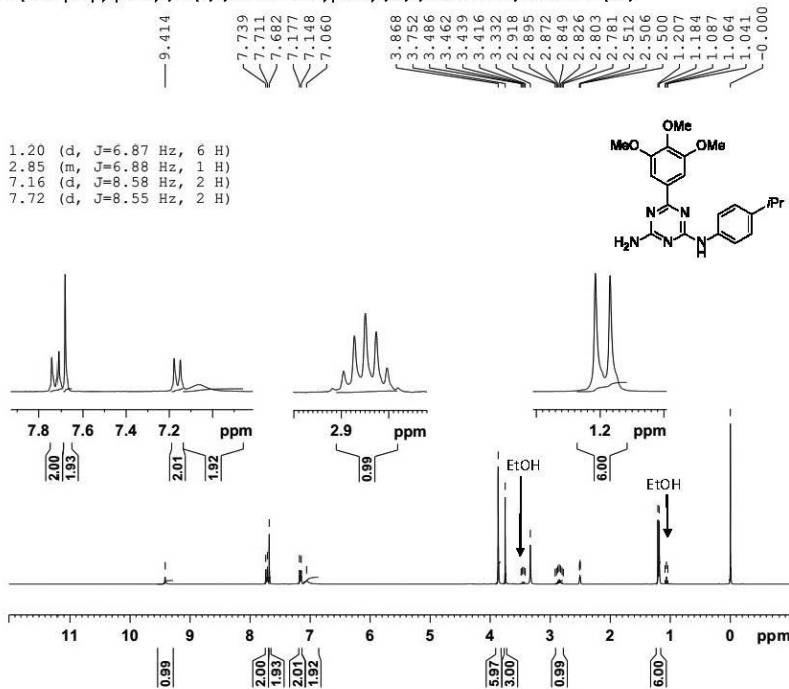

1.20 (d, J=6.87 Hz, 6 H)  
 2.85 (m, J=6.88 Hz, 1 H)  
 7.16 (d, J=8.58 Hz, 2 H)  
 7.72 (d, J=8.55 Hz, 2 H)

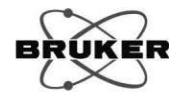

Current Data Parameters  
 NAME JAO271  
 EXPNO 1  
 PROCNO 1

F2 - Acquisition Parameters  
 Date\_ 20180530  
 Time 16.05  
 INSTRUM FOURIER300  
 PROBHD 5 mm DUL 13c-1  
 PULPROG zg30  
 TD 65536  
 SOLVENT DMSO  
 NS 16  
 DS 2  
 SWH 6103.516 Hz  
 FIDRES 0.093132 Hz  
 AQ 5.3687091 sec  
 RG 31.623  
 DW 81.920 usec  
 DE 6.50 usec  
 TE 299.3 K  
 D1 1.00000000 sec  
 TD0 1

----- CHANNEL f1 -----  
 SFO1 300.1618536 MHz  
 NUC1 1H  
 P1 13.50 usec  
 PLW1 9.30000019 W

F2 - Processing parameters  
 SI 65536  
 SF 300.1599992 MHz  
 WDW EM  
 SSB 0  
 LB 0.30 Hz  
 GB 0  
 PC 1.00

**N<sup>2</sup>-(4-Isopropylphenyl)-6-(3,4,5-trimethoxyphenyl)-1,3,5-triazine-2,4-diamine (21)**

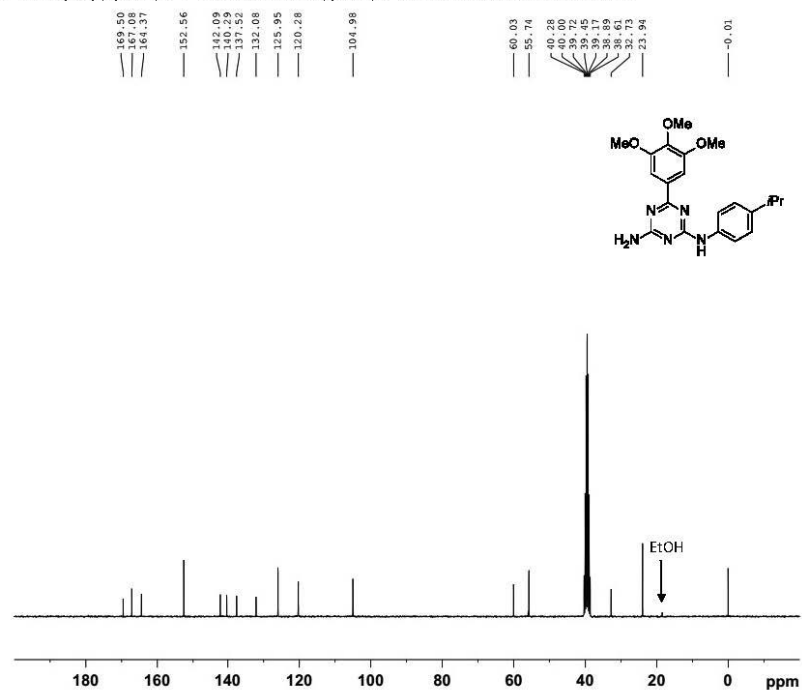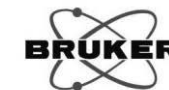

Current Data Parameters  
 NAME JAO271  
 EXPNO 2  
 PROCNO 1

F2 - Acquisition Parameters  
 Date\_ 20180531  
 Time 7.40  
 INSTRUM FOURIER300  
 PROBHD 5 mm DUL 13c-1  
 PULPROG zgpg30  
 TD 65536  
 SOLVENT DMSO  
 NS 4  
 DS 4  
 SWH 24414.063 Hz  
 FIDRES 0.372529 Hz  
 AQ 1.3421773 sec  
 RG 501.187  
 DW 20.480 usec  
 DE 6.50 usec  
 TE 300.2 K  
 D1 2.00000000 sec  
 D11 0.03000000 sec  
 D31 0.00001500 sec  
 D40 0.00439029 sec  
 I4 37  
 L5 53  
 P32 98.00 usec  
 TD0 4

----- CHANNEL f1 -----  
 SFO1 75.4828392 MHz  
 NUC1 13C  
 P1 15.00 usec  
 PLW1 22.00000000 W

----- CHANNEL f2 -----  
 SFO2 300.1612006 MHz  
 NUC2 1H  
 CPDPRG[2] waltz16  
 PCPD2 98.00 usec  
 PWR2 9.30000019 W  
 PLW12 0.29359001 W  
 PLW13 0.20359001 W

F2 - Processing parameters  
 SI 32768  
 SF 75.4753335 MHz  
 WDW EM  
 SSB 0  
 LB 1.00 Hz  
 GB 0  
 PC 1.40



## X-ray structure analysis of

### *N*<sup>2</sup>-(4-(trifluoromethoxy)phenyl)-6-(3,4,5-trimethoxyphenyl)-1,3,5-triazine-2,4-diamine (**20**)

The molecular structure of **20**, being representative of the series, has been established by single crystal X-crystallography and is illustrated in Figure S1. The triazine ring is strictly planar with the r.m.s. deviation of the six atoms comprising the plane being 0.0059 Å. The C–N bond lengths in the triazine ring lie within the relatively narrow range 1.331(3) Å, for C1–N3, to 1.354(3) Å, for C3–N3, suggesting substantial delocalisation of  $\pi$ -electron density over the ring. The appended N4, N5 and C4 atoms are close to co-planar with the ring lying, respectively, -0.039(3), 0.049(3) and 0.012(3) Å, out of the plane of the ring. The dihedral angle formed between the central ring and the methoxy-substituted ring of 2.30(8)° is consistent with a co-planar relationship, and the dihedral angle between the triazine and N5-bound rings of 11.93(7) indicates an inclined relationship. Overall, to a first approximation, the molecule is considered planar as seen in the dihedral angle between the outer rings of 10.84(7)°. The peripheral rings are orientated to the same side of the molecule, so the molecule has the shape of the letter U. The methoxy substituents adopt different conformations in order to minimise steric strain. Thus, the central methoxy group lies out of the plane of the ring to which it is connected with the C11–O2–C7–C8 torsion angle being 81.7(2)° whereas the flanking methoxy groups are co-planar with the ring: C10–O1–C6–C7 is 179.57(18)° and C12–O3–C8–C7 is 177.66(18)°. The trifluoromethoxy group lies out of the plane of the ring to which it is connected as seen in the C19–O4–C16–C15 torsion angle of 77.9(3)°.

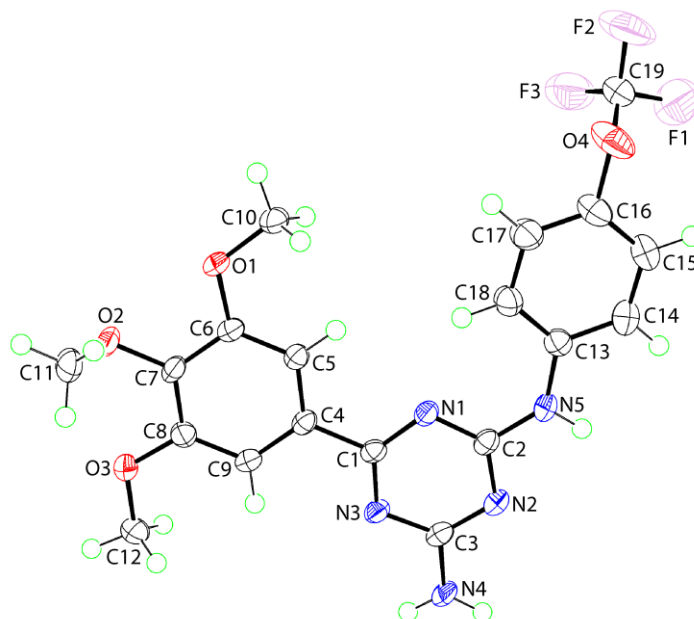

**Figure S1.** Molecular structure of **20**, showing atom labelling scheme and anisotropic displacement parameters at the 70% probability level.

In the crystal of **20**, the primary-amine forms a hydrogen bond with a methoxy-oxygen atom to sustain a linear supramolecular chain along the *b*-axis, as shown in Figure S2(a); geometric parameters characterising the intermolecular interactions are collated in the figure caption. The two remaining acidic hydrogen atoms do not

participate in structure-directing intermolecular interactions. A supramolecular layer in the *ac*-plane is formed through the cooperativity of  $\pi \cdots \pi$  interactions between the triazine-(N1-N3,C1-C3) and appended phenyl-(C4-C9) rings along with methyl-C-H $\cdots\pi$ (C13-C18) interactions. Layer stack along the *b*-axis with no directional interactions between them.

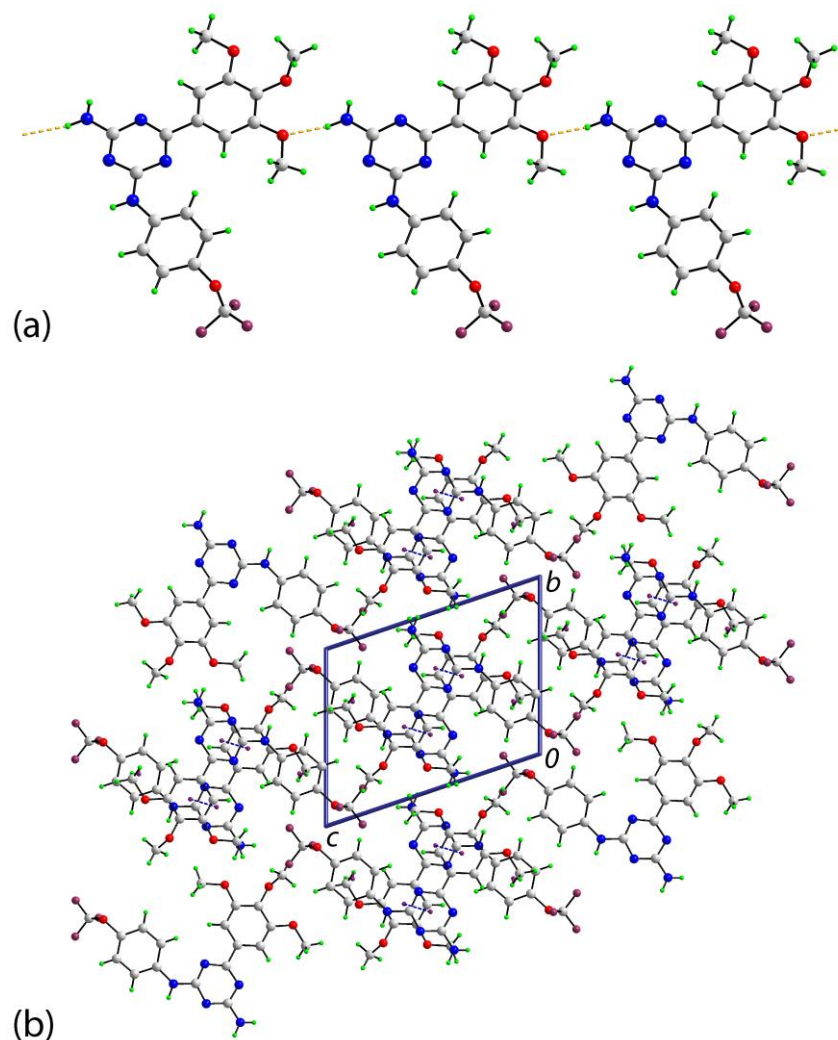

**Figure S2.** Molecular packing in the crystal of **20**:

(a) supramolecular linear chain sustained by amine-N-H $\cdots$ O(methoxy) hydrogen bonds (shown as orange dashed lines) [N4-H2n $\cdots$ O1<sup>i</sup>: H2n $\cdots$ O1<sup>i</sup> = 2.08(3) Å, N4 $\cdots$ O1<sup>i</sup> = 2.941(3) Å and angle at H2n= 164(3) $^\circ$  for symmetry operation (i)  $x, 1+y, z$ ];

(b) a view of the unit contents in projection down the *a*-axis. The  $\pi \cdots \pi$  [Cg(triazine)  $\cdots$  Cg(trimethoxyphenyl)<sup>ii</sup> = 3.5987(13) Å and angle of inclination = 2.30(11) $^\circ$  for symmetry operation (ii)  $2-x, 1-y, 1-z$ ] and methyl-C-H $\cdots\pi$  [C12-H12a $\cdots$ Cg(trifluoromethoxyphenyl)<sup>iii</sup> = 2.88 Å, C12 $\cdots$ Cg(trifluoromethoxyphenyl)<sup>iii</sup> = 3.461(3) Å with angle at H12a = 119 $^\circ$  and C12-H12c $\cdots$ Cg(trifluoromethoxyphenyl)<sup>iv</sup> = 2.90 Å, C12 $\cdots$ Cg(trifluoromethoxyphenyl)<sup>iv</sup> = 3.821(3) Å with angle at H12c = 157 $^\circ$  for symmetry operations (iii)  $2-x, 1-y, 1-z$  and (iv)  $1-x, 1-y, 1-z$ ] interactions are shown as blue and purple dashed lines, respectively.

## Concentration-response curves for the compounds tested against

### MDA-MB231 breast cancer cells

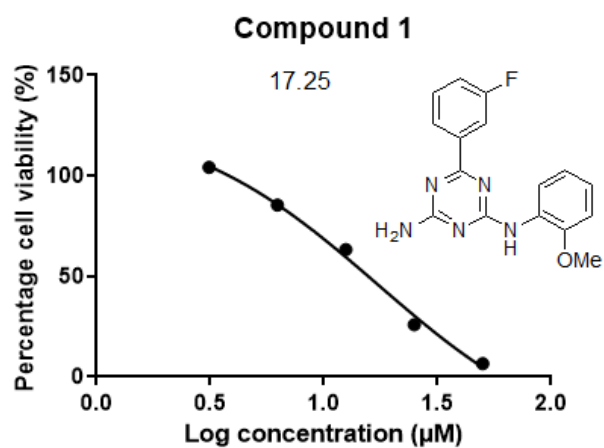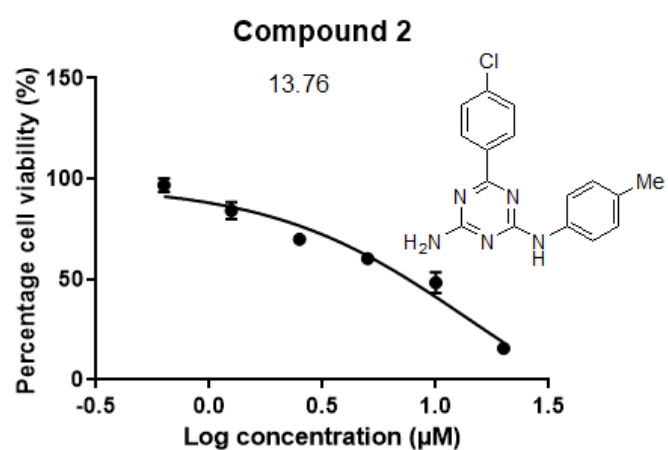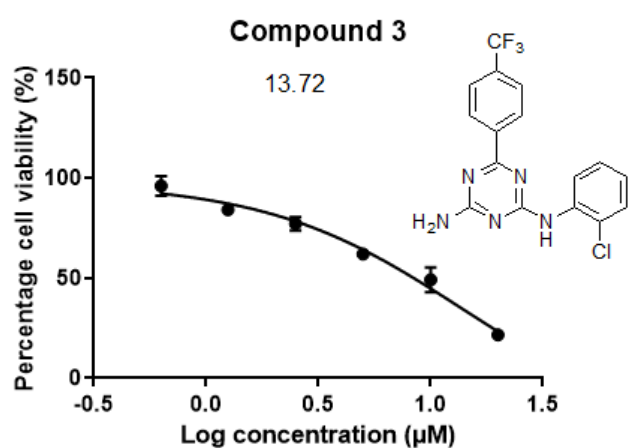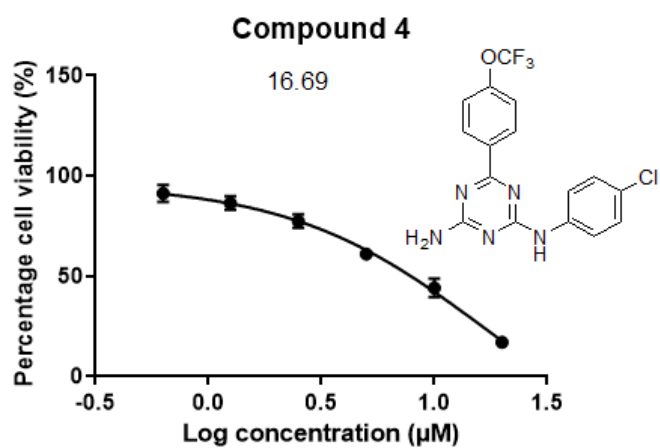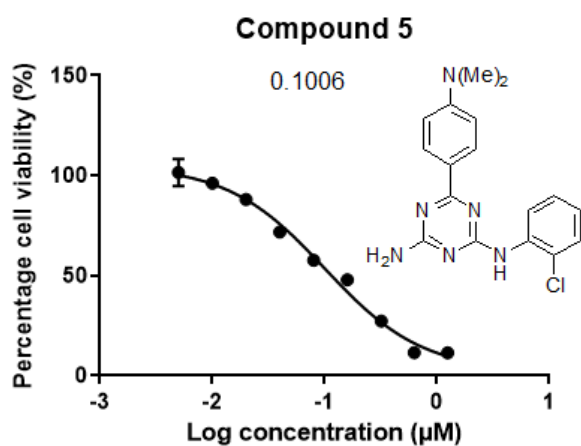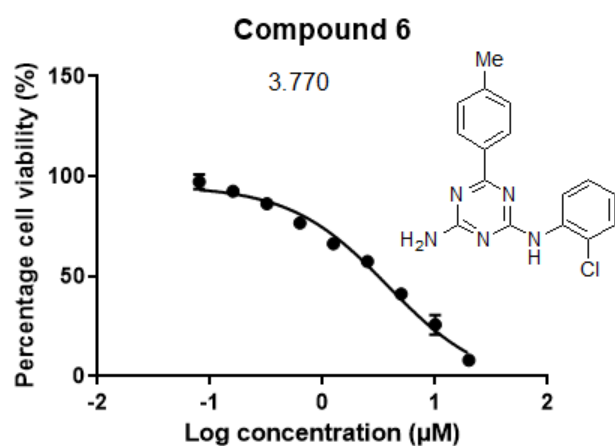

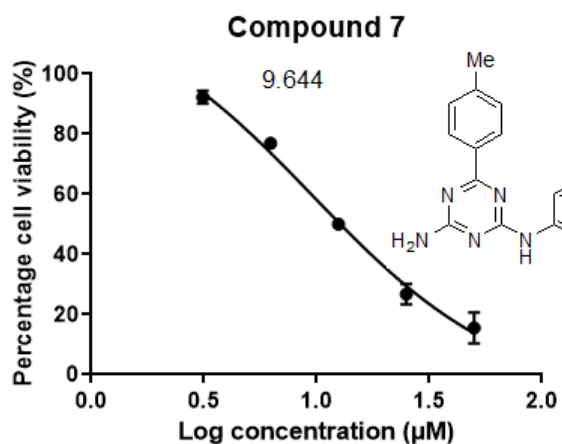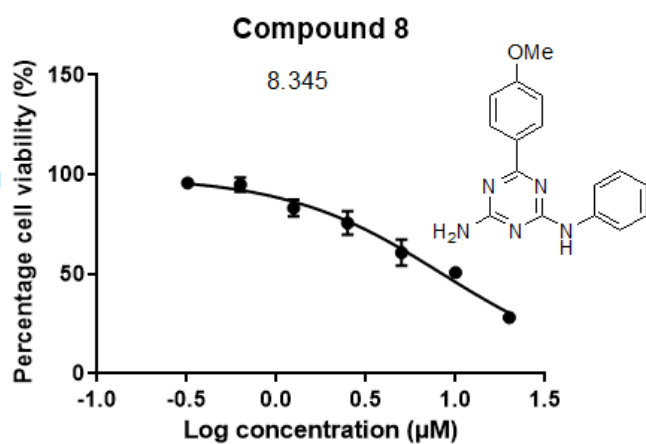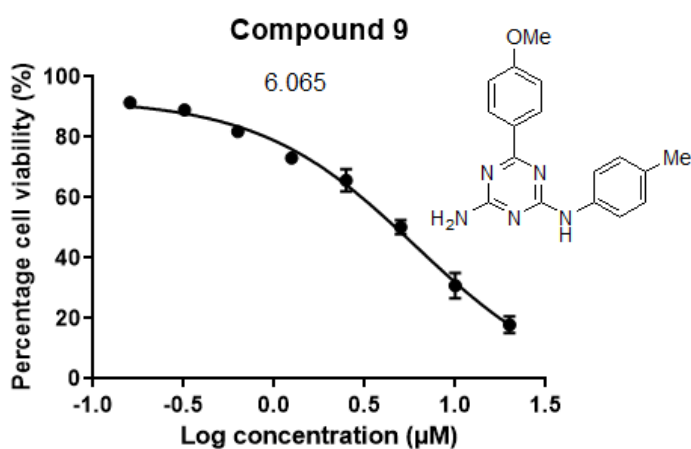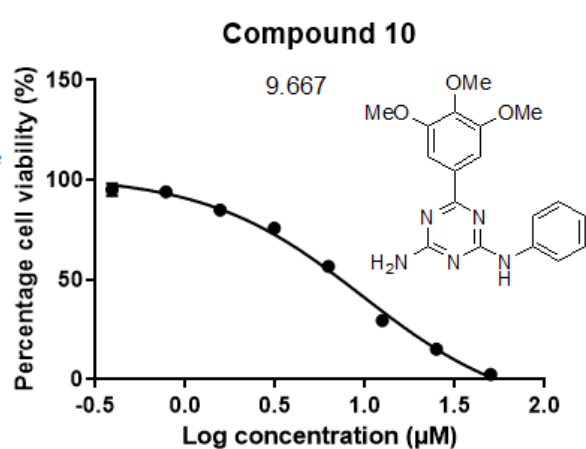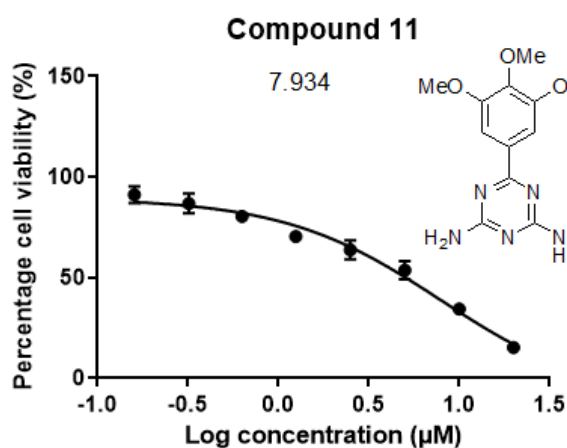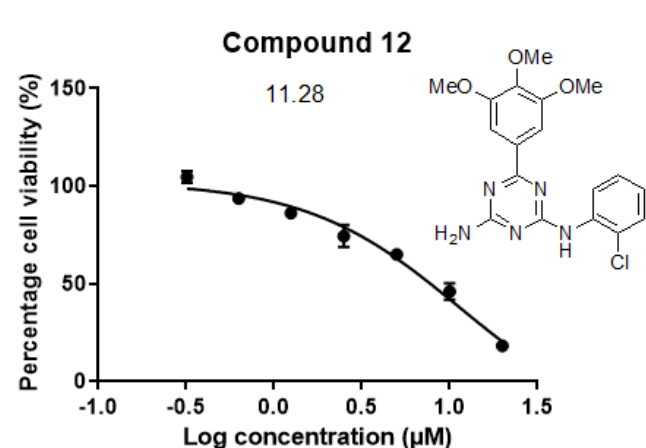

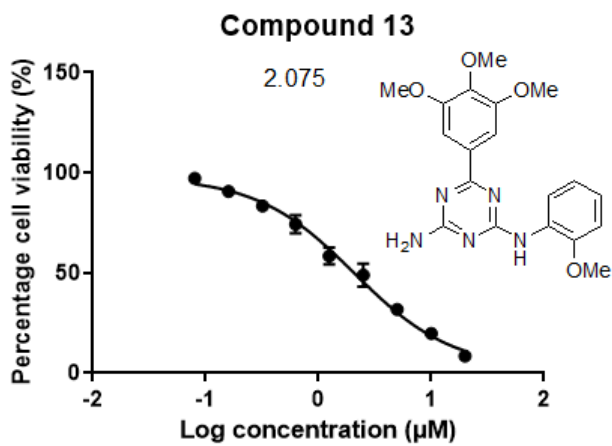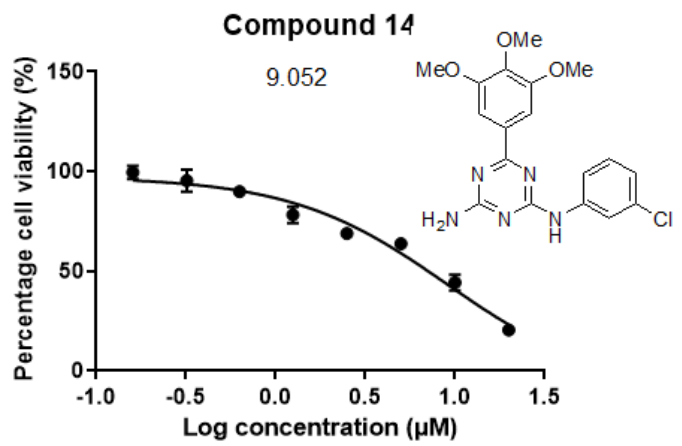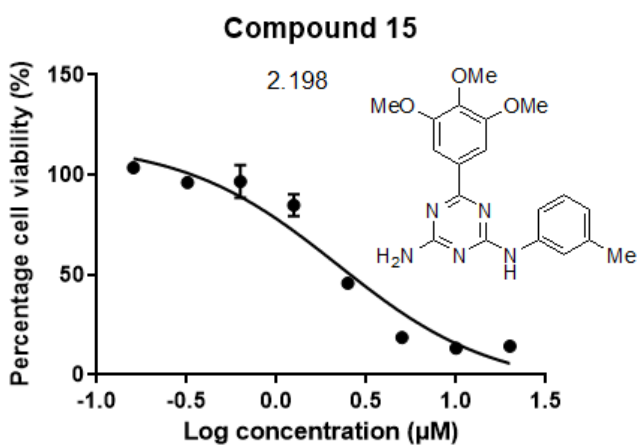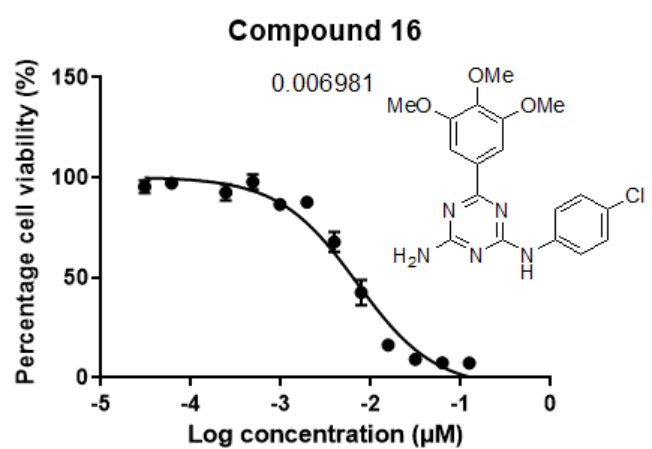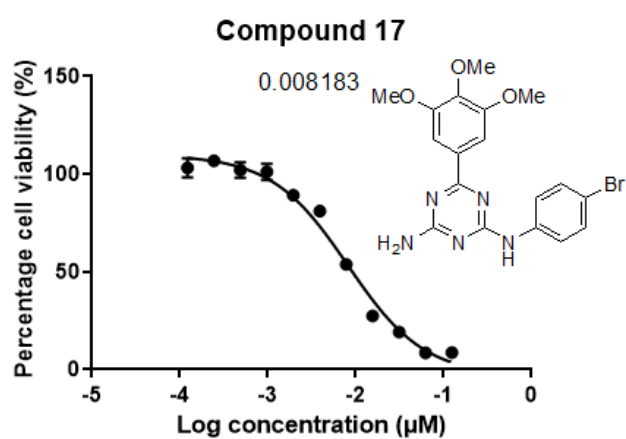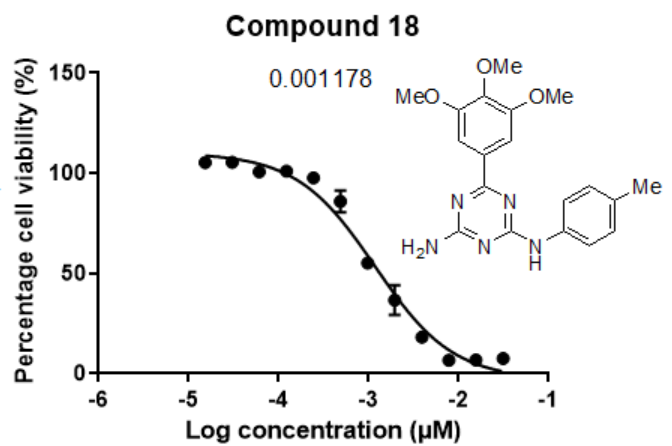

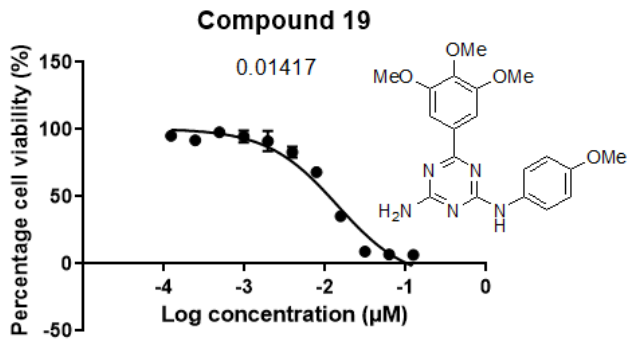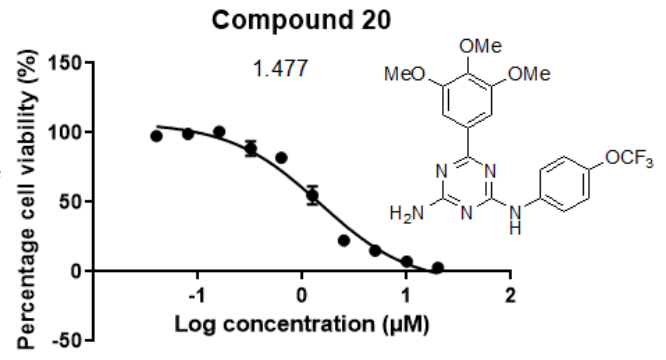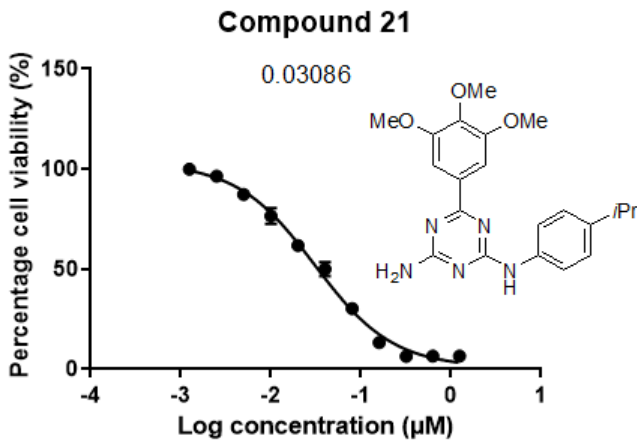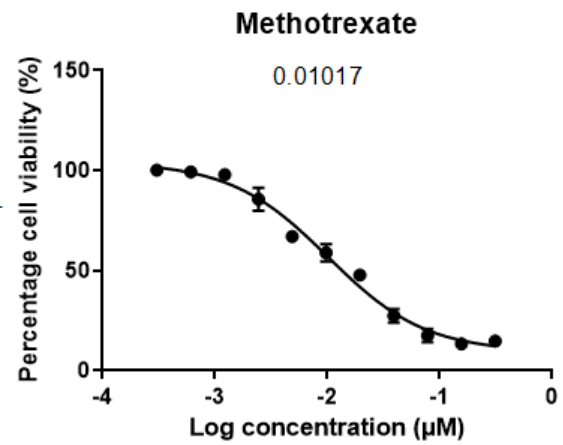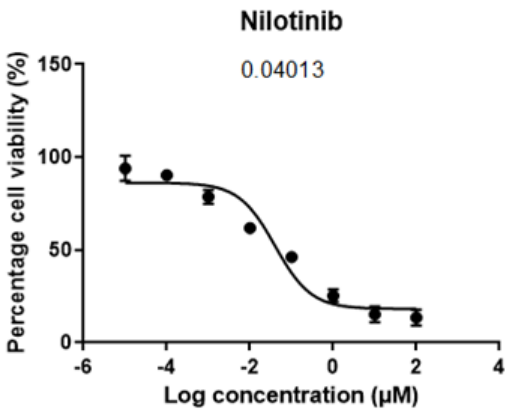

Concentration-response curves for the most active compounds tested against  
SKBR-3 breast cancer cells

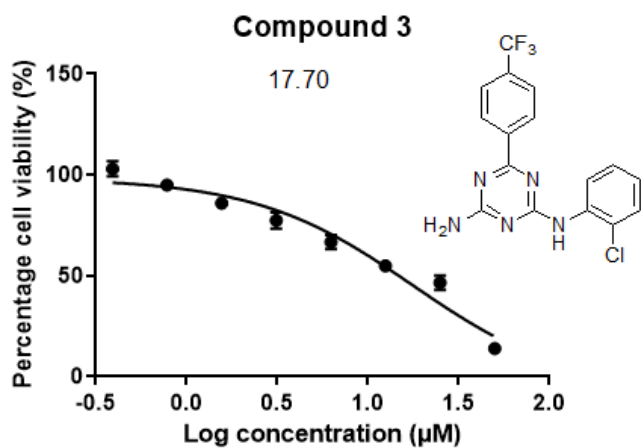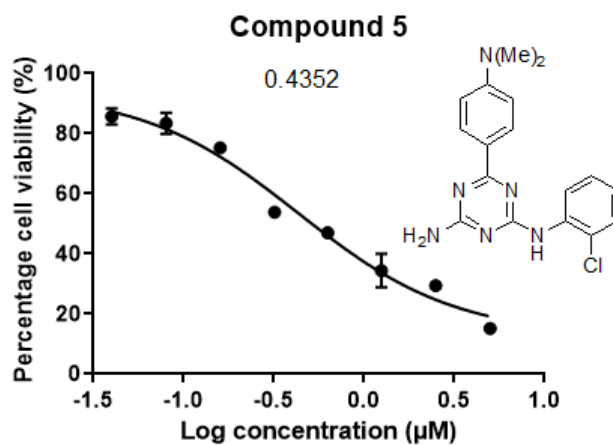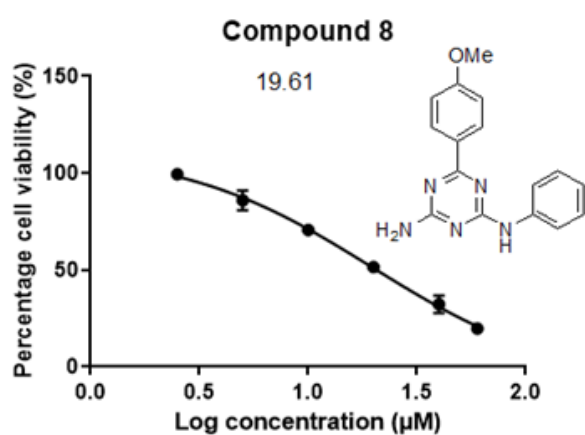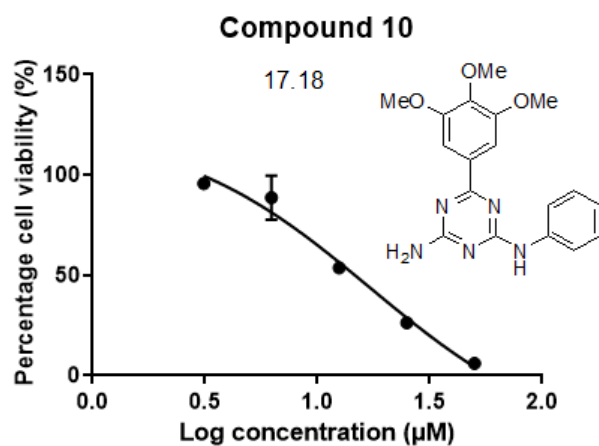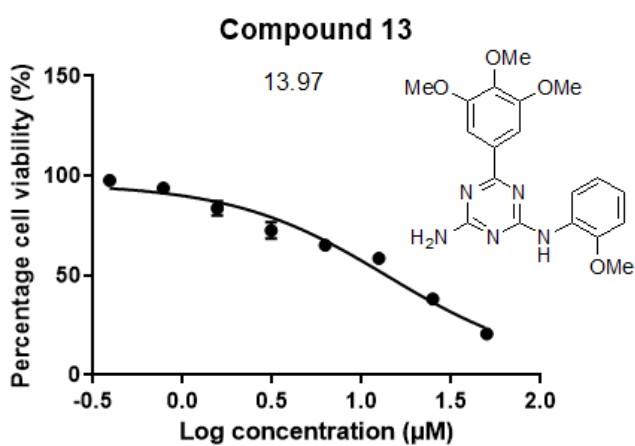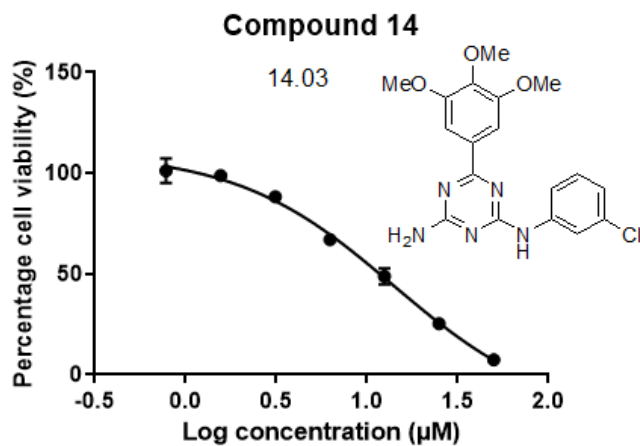

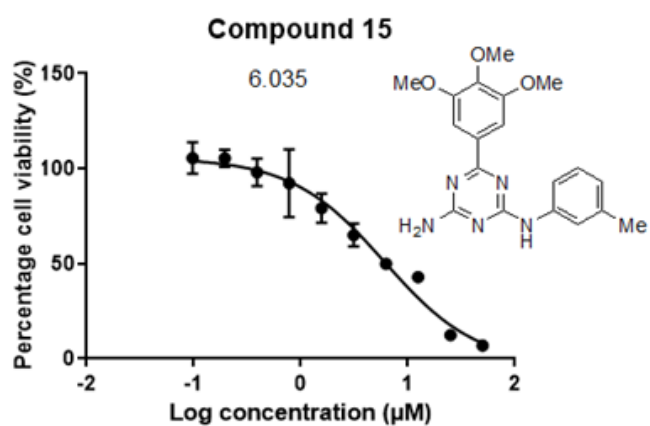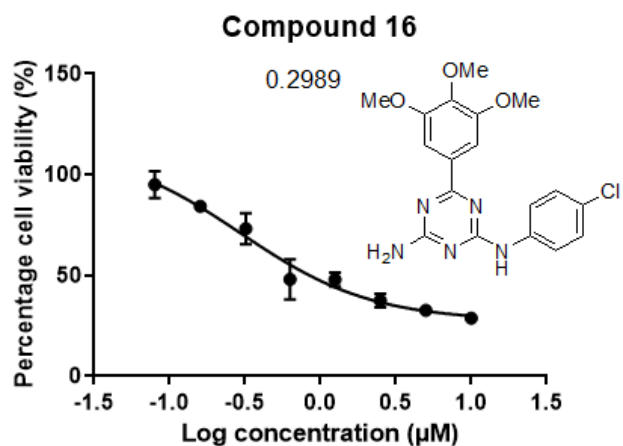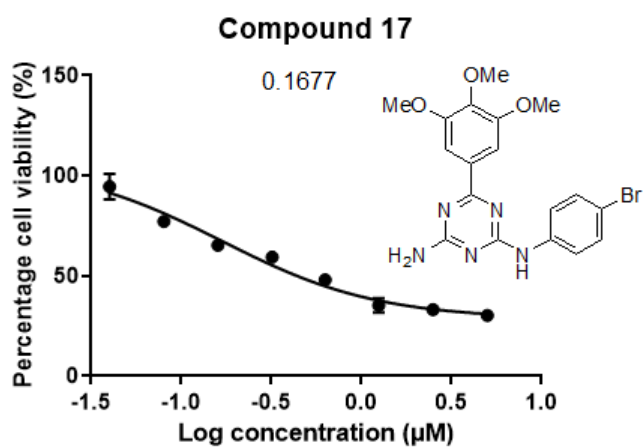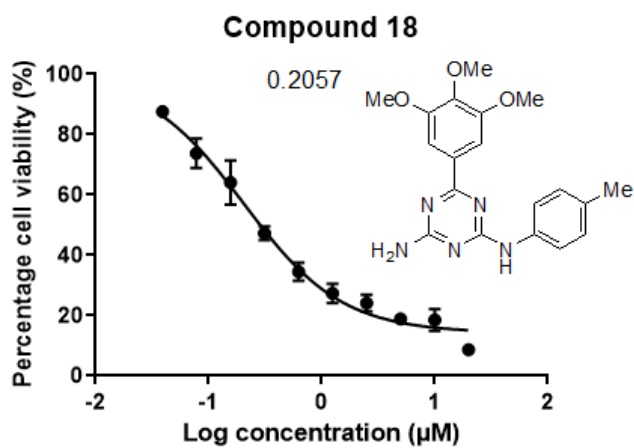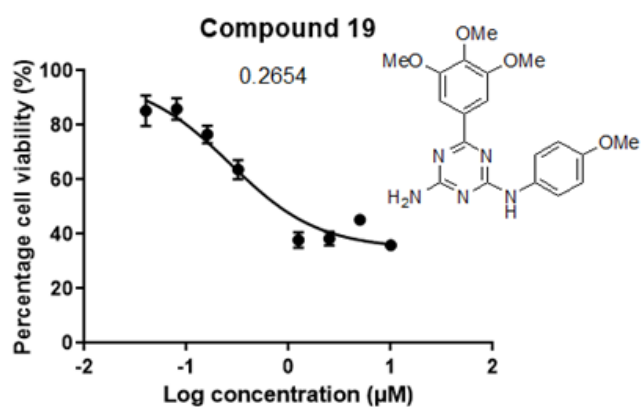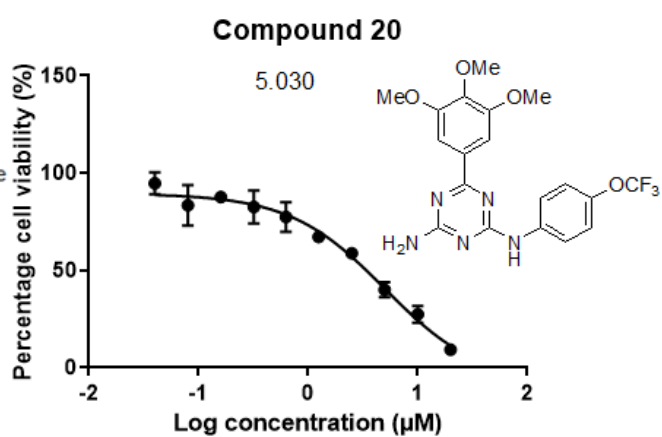



### Compound 21

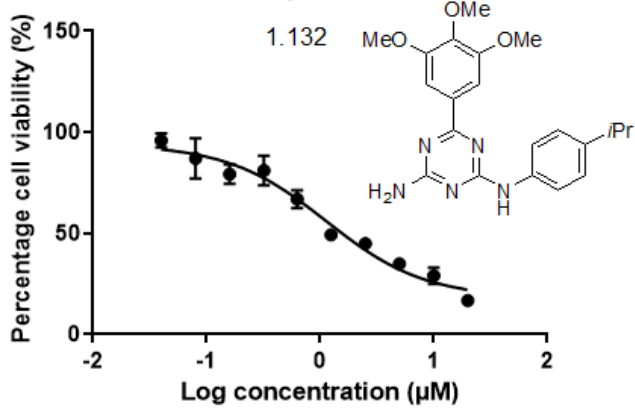

### Nilotinib

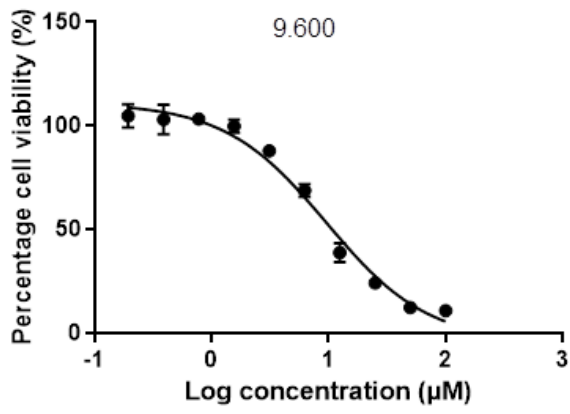

Concentration-response curves for the most active compounds tested against  
MCF-7 breast cancer cells

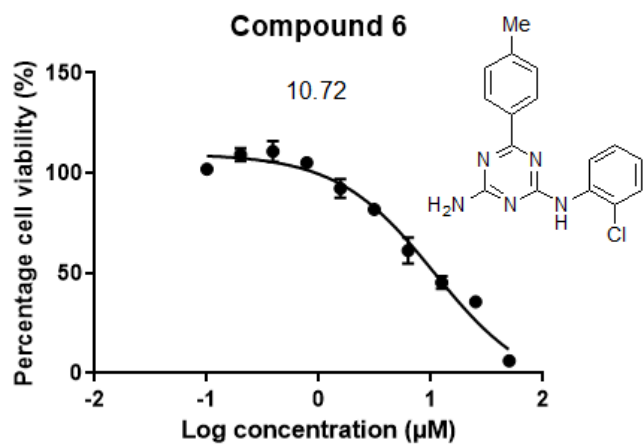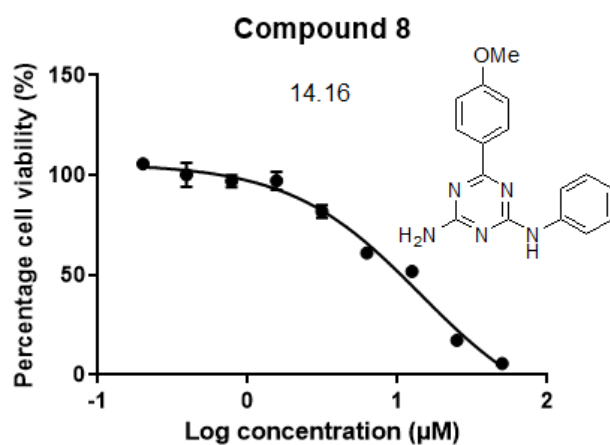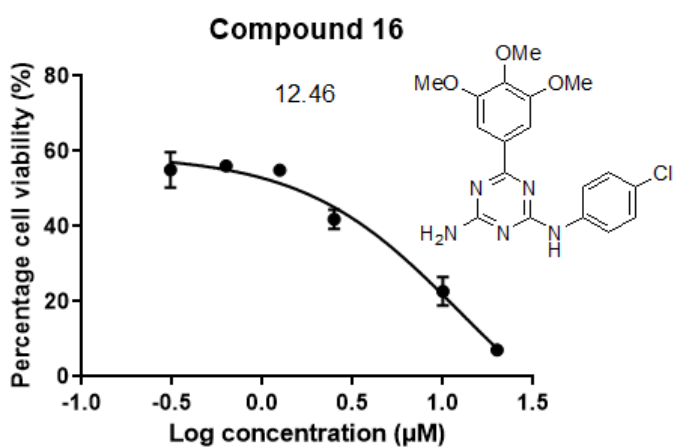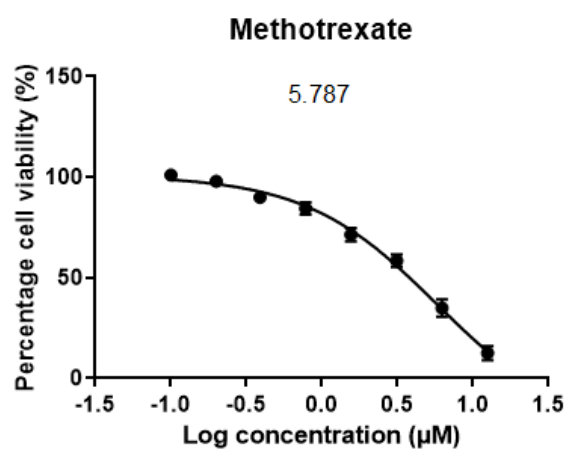

Time-dependent concentration-response curves for compounds 16 and 18 tested against MDA-MB231 breast cancer cells

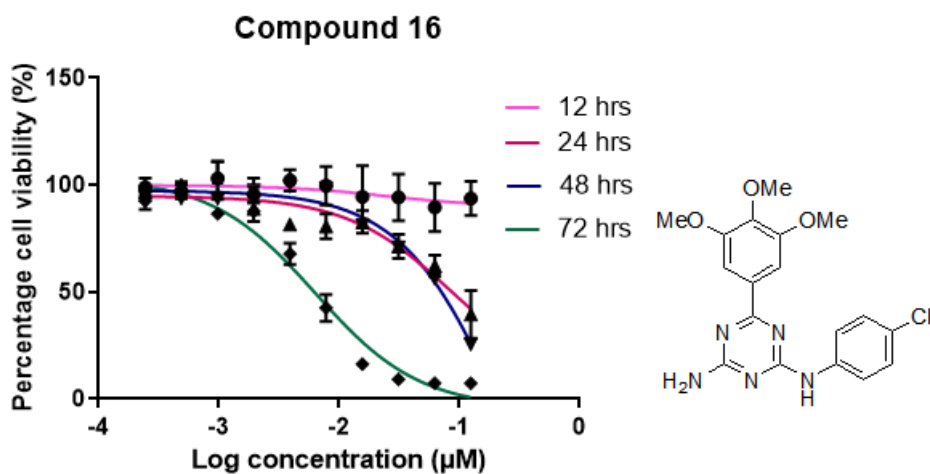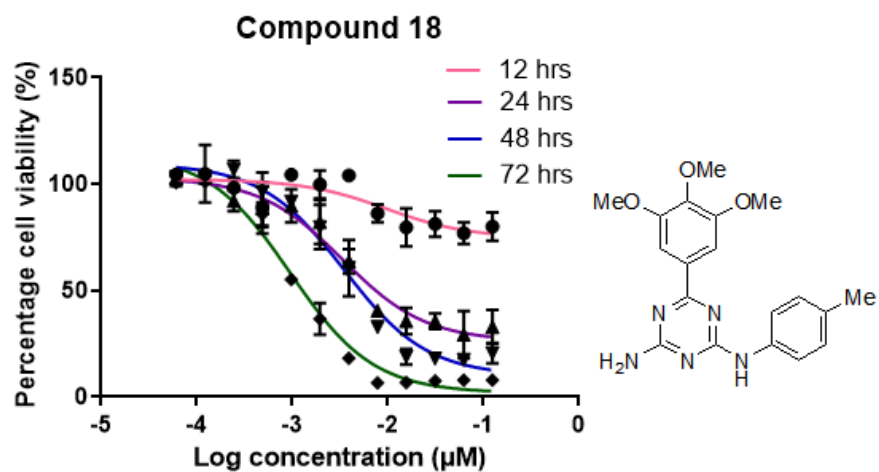

**Predicted ADME properties of compounds 1-21**

**Table S1(a).** Properties calculated / predicted by QikProp for compounds 1-7

| Property / Descriptor      | Compounds |          |          |          |          |          |          |
|----------------------------|-----------|----------|----------|----------|----------|----------|----------|
|                            | 1         | 2        | 3        | 4        | 5        | 6        | 7        |
| #stars                     | 0         | 0        | 1        | 3        | 1        | 0        | 0        |
| #rotor                     | 5         | 4        | 4        | 5        | 5        | 4        | 4        |
| CNS                        | -1        | -1       | -1       | -1       | -1       | -1       | -1       |
| mol_MW                     | 311.318   | 311.773  | 365.745  | 381.744  | 340.814  | 311.773  | 311.773  |
| dipole                     | 3.52      | 4.139    | 5.015    | 6.86     | 3.999    | 2.649    | 5.011    |
| SASA                       | 663.942   | 659.67   | 642.845  | 696.372  | 709.92   | 664.899  | 668.187  |
| FOSA                       | 88.845    | 87.813   | 22.596   | 2.005    | 153.168  | 87.856   | 87.857   |
| FISA                       | 112.503   | 116.153  | 108.718  | 115.201  | 109.667  | 108.614  | 116.165  |
| PISA                       | 420.217   | 384.054  | 357.419  | 384.981  | 381.353  | 402.696  | 392.521  |
| WPSA                       | 42.377    | 71.65    | 154.112  | 194.184  | 65.732   | 65.732   | 71.644   |
| volume                     | 1071.642  | 1076.618 | 1054.303 | 1114.602 | 1163.85  | 1074.633 | 1078.449 |
| donorHB                    | 3         | 3        | 3        | 3        | 3        | 3        | 3        |
| accptHB                    | 4.75      | 4        | 4        | 4        | 5        | 4        | 4        |
| dip <sup>2</sup> /V        | 0.011561  | 0.015911 | 0.023854 | 0.042222 | 0.013738 | 0.006528 | 0.023283 |
| ACx <sup>DN</sup> .5/SA    | 0.012392  | 0.010503 | 0.010777 | 0.009949 | 0.012199 | 0.01042  | 0.010369 |
| glob                       | 0.762784  | 0.770098 | 0.779296 | 0.74657  | 0.753738 | 0.763102 | 0.761144 |
| QPpolrz                    | 37.536    | 38.032   | 36.884   | 38.918   | 40.855   | 38.13    | 38.186   |
| QPlogPC16                  | 12.329    | 12.918   | 11.82    | 12.583   | 13.76    | 12.947   | 13.014   |
| QPlogPoct                  | 19.513    | 19.512   | 19.584   | 20.655   | 20.85    | 19.351   | 19.643   |
| QPlogPw                    | 12.925    | 12.186   | 11.942   | 12.096   | 13.007   | 12.272   | 12.264   |
| QPlogPo/w                  | 3.498     | 3.856    | 4.058    | 4.555    | 4.033    | 3.891    | 3.872    |
| QPlogS                     | -5.716    | -6.13    | -6.198   | -7.141   | -6.539   | -6.195   | -6.278   |
| CIQPlogS                   | -4.59     | -4.844   | -5.91    | -6.23    | -5.076   | -4.844   | -4.844   |
| QPlogHERG                  | -7.374    | -7.084   | -6.808   | -7.469   | -7.335   | -7.286   | -7.269   |
| QPPCaco                    | 849.238   | 784.193  | 922.413  | 800.653  | 903.506  | 924.508  | 783.98   |
| IP(eV)                     | 8.288     | 8.467    | 8.728    | 8.652    | 8.115    | 8.546    | 8.546    |
| EA(eV)                     | 0.659     | 0.674    | 3.22     | 0.846    | 0.349    | 0.549    | 0.567    |
| #metab                     | 2         | 1        | 1        | 1        | 2        | 2        | 1        |
| QPlogKhsa                  | 0.229     | 0.405    | 0.352    | 0.448    | 0.421    | 0.395    | 0.404    |
| HumanOralAbsorption        | 3         | 3        | 3        | 1        | 1        | 3        | 1        |
| PercentHumanOralAbsorption | 100       | 100      | 100      | 100      | 100      | 100      | 100      |
| SAfluorine                 | 42.377    | 0        | 88.37    | 122.533  | 0        | 0        | 0        |
| SAamideO                   | 0         | 0        | 0        | 0        | 0        | 0        | 0        |
| PSA                        | 73.984    | 66.209   | 64.771   | 74.891   | 67.919   | 64.702   | 66.211   |
| #NandO                     | 6         | 5        | 5        | 6        | 6        | 5        | 5        |
| RuleOfFive                 | 0         | 0        | 0        | 0        | 0        | 0        | 0        |
| #ringatoms                 | 18        | 18       | 18       | 18       | 18       | 18       | 18       |
| #in56                      | 18        | 18       | 18       | 18       | 18       | 18       | 18       |
| #noncon                    | 0         | 0        | 0        | 0        | 0        | 0        | 0        |
| #nonHatm                   | 23        | 22       | 25       | 26       | 24       | 22       | 22       |
| RuleOfThree                | 1         | 1        | 1        | 1        | 1        | 1        | 1        |

**Table S1(b).** Properties calculated / predicted by QikProp for compounds **8-14**

| Property / Descriptor      | Compounds |          |          |          |          |          |          |
|----------------------------|-----------|----------|----------|----------|----------|----------|----------|
|                            | 8         | 9        | 10       | 11       | 12       | 13       | 14       |
| #stars                     | 0         | 0        | 1        | 1        | 2        | 1        | 2        |
| #rotor                     | 5         | 5        | 7        | 7        | 7        | 8        | 7        |
| CNS                        | -2        | -2       | -2       | -2       | -2       | -2       | -2       |
| mol_MW                     | 293.327   | 307.354  | 353.38   | 371.37   | 387.825  | 383.406  | 387.825  |
| dipole                     | 4.364     | 3.967    | 5.125    | 4.618    | 4.676    | 3.498    | 6.725    |
| SASA                       | 644.114   | 666.657  | 735.081  | 742.371  | 755.895  | 766.443  | 759.212  |
| FOSA                       | 88.878    | 176.695  | 258.471  | 258.445  | 258.533  | 347.289  | 258.535  |
| FISA                       | 115.866   | 115.959  | 113.811  | 110.489  | 106.442  | 110.196  | 113.995  |
| PISA                       | 439.37    | 374.003  | 362.799  | 331.748  | 325.172  | 308.958  | 315.079  |
| WPSA                       | 0         | 0        | 0        | 41.689   | 65.749   | 0        | 71.603   |
| volume                     | 1043.191  | 1099.821 | 1194.192 | 1208.377 | 1234.265 | 1263.357 | 1238.065 |
| donorHB                    | 3         | 3        | 3        | 3        | 3        | 3        | 3        |
| acctHB                     | 4.75      | 4.75     | 6.25     | 6.25     | 6.25     | 7        | 6.25     |
| dip^2/V                    | 0.018256  | 0.014308 | 0.021993 | 0.01765  | 0.017719 | 0.009684 | 0.036532 |
| ACxDN^.5/SA                | 0.012773  | 0.012341 | 0.014727 | 0.014582 | 0.014321 | 0.015819 | 0.014259 |
| glob                       | 0.772286  | 0.772937 | 0.740536 | 0.739058 | 0.736166 | 0.737399 | 0.734454 |
| QPpolrz                    | 36.58     | 38.222   | 40.608   | 40.879   | 41.852   | 42.219   | 41.908   |
| QPlogPC16                  | 12.45     | 12.575   | 13.569   | 13.212   | 14.156   | 13.898   | 14.229   |
| QPlogPoct                  | 19.145    | 19.571   | 21.089   | 21.259   | 21.678   | 21.744   | 21.997   |
| QPlogPw                    | 13.016    | 12.626   | 13.736   | 13.534   | 13.503   | 13.939   | 13.496   |
| QPlogPo/w                  | 3.167     | 3.44     | 3.433    | 3.665    | 3.934    | 3.337    | 3.914    |
| QPlogS                     | -5.194    | -5.578   | -6.002   | -6.308   | -6.643   | -6.15    | -6.725   |
| CIQlogS                    | -4.248    | -4.514   | -4.891   | -5.237   | -5.556   | -5.205   | -5.556   |
| QPlogHERG                  | -7.312    | -6.99    | -7.461   | -7.336   | -7.352   | -7.255   | -7.331   |
| QPPCaco                    | 789.122   | 787.511  | 825.332  | 887.434  | 969.421  | 893.131  | 822.034  |
| IP(eV)                     | 8.492     | 8.399    | 8.468    | 8.579    | 8.528    | 8.198    | 8.625    |
| EA(eV)                     | 0.496     | 0.486    | 0.572    | 0.634    | 0.625    | 0.5      | 0.646    |
| #metab                     | 2         | 2        | 4        | 4        | 4        | 5        | 4        |
| QPlogKhsa                  | 0.163     | 0.309    | 0.2      | 0.235    | 0.299    | 0.205    | 0.307    |
| HumanOralAbsorption        | 3         | 3        | 3        | 1        | 1        | 3        | 1        |
| PercentHumanOralAbsorption | 100       | 100      | 100      | 100      | 100      | 100      | 100      |
| SAfluorine                 | 0         | 0        | 0        | 41.689   | 0        | 0        | 0        |
| SAamideO                   | 0         | 0        | 0        | 0        | 0        | 0        | 0        |
| PSA                        | 75.304    | 75.314   | 85.119   | 84.546   | 83.623   | 92.902   | 85.146   |
| #NandO                     | 6         | 6        | 8        | 8        | 8        | 9        | 8        |
| RuleOfFive                 | 0         | 0        | 0        | 0        | 0        | 0        | 0        |
| #ringatoms                 | 18        | 18       | 18       | 18       | 18       | 18       | 18       |
| #in56                      | 18        | 18       | 18       | 18       | 18       | 18       | 18       |
| #noncon                    | 0         | 0        | 0        | 0        | 0        | 0        | 0        |
| #nonHatm                   | 22        | 23       | 26       | 27       | 27       | 28       | 27       |
| RuleOfThree                | 0         | 0        | 1        | 1        | 1        | 1        | 1        |

**Table S1(c).** Properties calculated / predicted by QikProp for compounds **15-21**

| Property / Descriptor      | Compounds |          |          |          |          |          |          |
|----------------------------|-----------|----------|----------|----------|----------|----------|----------|
|                            | 15        | 16       | 17       | 18       | 19       | 20       | 21       |
| #stars                     | 2         | 2        | 2        | 1        | 0        | 2        | 2        |
| #rotor                     | 7         | 7        | 7        | 7        | 8        | 8        | 8        |
| CNS                        | -2        | -2       | -2       | -2       | -2       | -2       | -2       |
| mol_MW                     | 367.407   | 387.825  | 432.276  | 367.407  | 383.406  | 437.378  | 395.46   |
| dipole                     | 4.992     | 7.55     | 7.209    | 4.732    | 5.887    | 8.48     | 4.615    |
| SASA                       | 766.568   | 759.198  | 764.151  | 758.052  | 750.265  | 803.458  | 800.441  |
| FOSA                       | 346.307   | 258.528  | 258.531  | 346.327  | 347.388  | 260.791  | 422.065  |
| FISA                       | 113.872   | 113.995  | 114.023  | 113.955  | 114.03   | 115.09   | 114.194  |
| PISA                       | 306.388   | 315.035  | 314.274  | 297.77   | 288.846  | 306.026  | 264.182  |
| WPSA                       | 0         | 71.64    | 77.322   | 0        | 0        | 121.551  | 0        |
| volume                     | 1253.024  | 1238.006 | 1246.71  | 1250.965 | 1255.543 | 1349.821 | 1348.757 |
| donorHB                    | 3         | 3        | 3        | 3        | 3        | 3        | 3        |
| acctptHB                   | 6.25      | 6.25     | 6.25     | 6.25     | 7        | 6.25     | 6.25     |
| dip^2/V                    | 0.019885  | 0.046045 | 0.041685 | 0.017901 | 0.027605 | 0.053274 | 0.015789 |
| ACxDN^.5/SA                | 0.014122  | 0.014259 | 0.014167 | 0.01428  | 0.01616  | 0.013473 | 0.013524 |
| glob                       | 0.733253  | 0.734444 | 0.733099 | 0.740678 | 0.750191 | 0.735167 | 0.73755  |
| QPpolrz                    | 42.423    | 41.905   | 42.246   | 42.259   | 41.715   | 45.652   | 45.209   |
| QPlogPC16                  | 13.825    | 14.229   | 14.363   | 13.698   | 13.629   | 14.019   | 14.477   |
| QPlogPoct                  | 21.575    | 22.127   | 22.208   | 21.515   | 21.863   | 23.765   | 22.433   |
| QPlogPw                    | 13.429    | 13.496   | 13.505   | 13.35    | 13.789   | 13.345   | 13.005   |
| QPlogPo/w                  | 3.723     | 3.914    | 3.987    | 3.706    | 3.443    | 4.781    | 4.27     |
| QPlogS                     | -6.538    | -6.725   | -6.834   | -6.393   | -5.878   | -7.54    | -6.958   |
| CIQPlogS                   | -5.16     | -5.556   | -6.429   | -5.16    | -5.205   | -6.53    | -5.705   |
| QPlogHERG                  | -7.309    | -7.331   | -7.349   | -7.148   | -6.952   | -7.277   | -7.039   |
| QPPCaco                    | 824.23    | 822.033  | 821.517  | 822.742  | 821.392  | 802.602  | 818.458  |
| IP(eV)                     | 8.442     | 8.52     | 8.624    | 8.372    | 8.302    | 8.661    | 8.357    |
| EA(eV)                     | 0.561     | 0.642    | 0.655    | 0.559    | 0.594    | 0.684    | 0.554    |
| #metab                     | 5         | 3        | 3        | 4        | 4        | 4        | 4        |
| QPlogKhsa                  | 0.344     | 0.307    | 0.328    | 0.345    | 0.197    | 0.555    | 0.554    |
| HumanOralAbsorption        | 1         | 1        | 1        | 1        | 3        | 1        | 1        |
| PercentHumanOralAbsorption | 100       | 100      | 100      | 100      | 100      | 100      | 100      |
| SAfluorine                 | 0         | 0        | 0        | 0        | 0        | 121.551  | 0        |
| SAamideO                   | 0         | 0        | 0        | 0        | 0        | 0        | 0        |
| PSA                        | 85.128    | 85.141   | 85.146   | 85.136   | 94.304   | 94.193   | 85.163   |
| #NandO                     | 8         | 8        | 8        | 8        | 9        | 9        | 8        |
| RuleOfFive                 | 0         | 0        | 0        | 0        | 0        | 0        | 0        |
| #ringatoms                 | 18        | 18       | 18       | 18       | 18       | 18       | 18       |
| #in56                      | 18        | 18       | 18       | 18       | 18       | 18       | 18       |
| #noncon                    | 0         | 0        | 0        | 0        | 0        | 0        | 0        |
| #nonHatm                   | 27        | 27       | 27       | 27       | 28       | 31       | 29       |
| RuleOfThree                | 1         | 1        | 1        | 1        | 1        | 1        | 1        |

## QikProp descriptors and properties

**#stars** = Number of property or descriptor values that fall outside the 95% range of similar values for known drugs.

**#rotor** = Number of non-trivial (not CX3), non-hindered (not alkene, amide, small ring) rotatable bonds.

**CNS** = Predicted central nervous system activity on a -2 (inactive) to +2 (active) scale.

**Dipole** = Computed dipole moment of the molecule.

**SASA** = Total solvent accessible surface area (SASA) in square angstroms using a probe with a 1.4 Å radius.

**FOSA** = Hydrophobic component of the SASA (saturated carbon and attached hydrogen).

**FISA** = Hydrophilic component of the SASA (SASA on N, O, and H on heteroatoms).

**PISA** =  $\pi$  (carbon and attached hydrogen) component of the SASA.

**WPSA** = Weakly polar component of the SASA (halogens, P, and S).

**Volume** = Total solvent-accessible volume in cubic angstroms using a probe with a 1.4 Å radius. 500.0 – 2000.0

**donorHB** = Estimated number of hydrogen bonds that would be donated by the solute to water molecules in an aqueous solution.

**accptHB** = Estimated number of hydrogen bonds that would be accepted by the solute from water molecules.

**dip<sup>2</sup>/V** = Square of the dipole moment divided by the molecular volume. This is the key term in the Kirkwood-Onsager equation for the free energy of solvation of a dipole with volume V.

**ACxDN<sup>0.5</sup>/SA** = Index of cohesive interaction in solids, (accptHB) (donorHB)<sup>1/2</sup>/(SA)

**glob** = Globularity descriptor,  $(4\pi r^2)/(SASA)$ , r is the radius of a sphere with a volume equal to the molecular volume. Globularity is 1.0 for a spherical molecule.

**QPpolrz** = Predicted polarizability in cubic angstroms.

**QPlogPC16** = Predicted hexadecane/gas partition coefficient.

**QPlogPoct** = Predicted octanol/gas partition coefficient.

**QPlogPw** = Predicted water/gas partition coefficient.

**QPlogPo/w** = Predicted octanol/water partition coefficient.

**QPlogS** = Predicted aqueous solubility, log S. S in mol dm<sup>-3</sup> is the concentration of the solute in a saturated solution that is in equilibrium with the crystalline solid.

**CIQPlogS** = Conformation-independent predicted aqueous solubility, log S. S in mol dm<sup>-3</sup> is the concentration of the solute in a saturated solution that is in equilibrium with the crystalline solid.

**QPlogHERG** = Predicted IC<sub>50</sub> value for blockage of HERG K<sup>+</sup> channels.

**QPPCaco** = Predicted apparent Caco-2 cell permeability in nm/sec. Caco-2 cells are a model for the gut blood barrier.

**IP(eV)** = PM3 calculated ionization potential.

**EA(eV)** = PM3 calculated electron affinity.

**#metab** = Number of likely metabolic reactions.

**QPlogKhsa** = Prediction of binding to human serum albumin.

**HumanOralAbsorption** = Predicted qualitative human oral absorption:

**PercentHuman-OralAbsorption** = Predicted human oral absorption on 0 to 100% scale. The prediction is based on a quantitative multiple linear regression model. This property usually correlates well with HumanOral-Absorption, as both measure the same property.

**SAFluorine** = Solvent-accessible surface area of fluorine atoms.

**SAamideO** = Solvent-accessible surface area of amide oxygen atoms.

**PSA** = Van der Waals surface area of polar nitrogen and oxygen atoms.

**#NandO** = Number of nitrogen and oxygen atoms.

**RuleOfFive** = Number of violations of Lipinski's rule of five. The rules are:  $\text{mol\_MW} < 500$ ,  $\text{QPlogPo/w} < 5$ ,  $\text{donorHB} \leq 5$ ,  $\text{acptHB} \leq 10$ . Compounds that satisfy these rules are considered drug-like.

**RuleOfThree** = Number of violations of Jorgensen's rule of three. The three rules are:  $\text{QPlogS} > -5.7$ ,  $\text{PCaco} > 22 \text{ nm/s}$ ,  $\text{\# Primary Metabolites} < 7$ . Compounds with fewer (and preferably no) violations of these rules are more likely to be orally available.

**#ringatoms** = Number of atoms in rings.

**#in56** = Number of atoms in 5- or 6-membered rings.

**#noncon** = Number of ring atoms not able to form conjugated aromatic systems (e.g.  $\text{sp}^3 \text{ C}$ ).

**#nonHatm** = Number of heavy atoms (nonhydrogen atoms).
